# Supplementary material for: Factors influencing rapid progress in child health in post-conflict Liberia: a mixed methods country case study on progress in child survival, 2000–2013
Source: PubMed Central journal article supplement — BMJ Open. 2018 Oct 15;8(10):e021879. doi: 10.1136/bmjopen-2018-021879 (PMC6196853; doi:10.1136/bmjopen-2018-021879), 2018-10-15
Supplement: bmjopen-2018-021879.draft_revisions.pdf [file bmjopen-2018-021879.draft_revisions.pdf]

# BMJ Open

BMJ Open is committed to open peer review. As part of this commitment we make the peer review history of every article we publish publicly available.

When an article is published we post the peer reviewers' comments and the authors' responses online. We also post the versions of the paper that were used during peer review. These are the versions that the peer review comments apply to.

The versions of the paper that follow are the versions that were submitted during the peer review process. They are not the versions of record or the final published versions. They should not be cited or distributed as the published version of this manuscript.

BMJ Open is an open access journal and the full, final, typeset and author-corrected version of record of the manuscript is available on our site with no access controls, subscription charges or pay-per-view fees (<http://bmjopen.bmj.com>).

If you have any questions on BMJ Open's open peer review process please email [info.bmjopen@bmj.com](mailto:info.bmjopen@bmj.com)

# BMJ Open

## Factors influencing rapid progress in child health in post-conflict Liberia: a country case study on progress in child survival, 2000-2013

|                               |                                                                                                                                                                                                                                                                                                                                                                                                                                                                                                                                                                                                                                                                                                                                                                     |
|-------------------------------|---------------------------------------------------------------------------------------------------------------------------------------------------------------------------------------------------------------------------------------------------------------------------------------------------------------------------------------------------------------------------------------------------------------------------------------------------------------------------------------------------------------------------------------------------------------------------------------------------------------------------------------------------------------------------------------------------------------------------------------------------------------------|
| Journal:                      | <i>BMJ Open</i>                                                                                                                                                                                                                                                                                                                                                                                                                                                                                                                                                                                                                                                                                                                                                     |
| Manuscript ID                 | bmjopen-2018-021879                                                                                                                                                                                                                                                                                                                                                                                                                                                                                                                                                                                                                                                                                                                                                 |
| Article Type:                 | Research                                                                                                                                                                                                                                                                                                                                                                                                                                                                                                                                                                                                                                                                                                                                                            |
| Date Submitted by the Author: | 22-Jan-2018                                                                                                                                                                                                                                                                                                                                                                                                                                                                                                                                                                                                                                                                                                                                                         |
| Complete List of Authors:     | Brault, Marie; University of Connecticut System, Anthropology<br>Kennedy, Stephen; University of Liberia, University of Liberia-Pacific<br>Institute for Research & Evaluation (UL-PIRE) Africa Center<br>Haley, Connie; Vanderbilt Institute for Global Health, ; Vanderbilt<br>University Medical Center, Dept. of Medicine, Division of Epidemiology<br>Clarke, Adolphus; Liberia Ministry of Health and Social Welfare<br>Duworko, Musu; World Health Organization Country Office for Liberia<br>Habimana, Phaniel; World Health Organization/Regional Office for Africa,<br>Vermund, Sten; Vanderbilt University, Institute for Global Health<br>Kipp, Aaron; Vanderbilt University,<br>Mwinga, Kasonde; World Health Organization/Regional Office for Africa, |
| Keywords:                     | PUBLIC HEALTH, QUALITATIVE RESEARCH, Community child health <<br>PAEDIATRICS, International health services < HEALTH SERVICES<br>ADMINISTRATION & MANAGEMENT                                                                                                                                                                                                                                                                                                                                                                                                                                                                                                                                                                                                        |
|                               |                                                                                                                                                                                                                                                                                                                                                                                                                                                                                                                                                                                                                                                                                                                                                                     |

SCHOLARONE™  
Manuscripts

Only

1  
2  
3 1 Factors influencing rapid progress in child health in post-conflict Liberia: a country case study on progress  
4 2 in child survival, 2000-2013  
5  
6 3

7  
8 4 Marie A. Brault<sup>1</sup>, Stephen B. Kennedy<sup>2</sup>, Connie A. Haley<sup>3,4</sup>, Adolphus T. Clarke<sup>5</sup>, Musu C. Duworko<sup>6</sup>,  
9 5 Phaniel Habimana<sup>7</sup>, Sten H. Vermund<sup>3,8</sup>, Aaron M. Kipp<sup>3,4\*</sup>, Kasonde Mwinga<sup>7</sup>  
10  
11 6  
12 7  
13

14 8 <sup>1</sup>Department of Anthropology, University of Connecticut, Storrs, CT USA  
15

16 9 <sup>2</sup>University of Liberia-Pacific Institute for Research & Evaluation (UL-PIRE) Africa Center, University of  
17 10 Liberia, Monrovia, Liberia  
18

19 11 <sup>3</sup>Vanderbilt Institute for Global Health, Vanderbilt University, Nashville, TN, USA <sup>4</sup>Department of  
20 12 Medicine and, Vanderbilt University Medical Center, Nashville, TN, USA  
21

22 13 <sup>5</sup>Liberia Ministry of Health and Social Welfare, Monrovia, Liberia  
23

24 14 <sup>6</sup>World Health Organization/Liberia Country office, Monrovia, Liberia  
25

26 15 <sup>7</sup>World Health Organization/Regional Office for Africa, Brazzaville, Congo  
27

28 16 <sup>8</sup>Department of Pediatrics, Vanderbilt University Medical Center, Nashville, TN, USA  
29  
30 17

31  
32 18 Corresponding author: \*Aaron M. Kipp

33  
34 19 Vanderbilt Institute for Medicine and Public Health

35 20 2525 West End. Ave., ste 614

36 21 Nashville, TN 37203  
37  
38 21

39 22 Email: [aaron.kipp@Vanderbilt.Edu](mailto:aaron.kipp@Vanderbilt.Edu)  
40

41 23 Word Count: 5982  
42  
43 24  
44  
45 25  
46  
47  
48 26  
49  
50  
51  
52  
53 27  
54  
55  
56  
57  
58  
59  
60

**28 ABSTRACT**

29 Objectives: Only 12 countries in the World Health Organization's African region met Millennium  
30 Development Goal #4 (MDG#4) to reduce under-five mortality by two-thirds by 2015. Given the  
31 variability across the African region, a four country study was undertaken to examine barriers and  
32 facilitators of child survival prior to 2015. Liberia was selected for an in-depth case study due to its  
33 success in reducing under-five mortality by 73%, and thus successfully meeting MDG#4. Liberia's success  
34 was particularly notable given the civil war that ended in 2003. We examined the factors contributing to  
35 their reductions in under-five mortality.

36 Design: A case study approach drawing on data from quantitative indicators, national documents, and  
37 qualitative interviews was used to describe factors that enabled Liberia to rebuild their maternal,  
38 neonatal and child health (MNCH) programs and reduce under-five mortality following the country's civil  
39 war.

40 Setting: The interviews were conducted in Monrovia (Montserrado County) and the areas in and around  
41 Gbarnga, Liberia (Bong County, North Central region).

42 Participants: Key informant interviews were conducted with Ministry of Health officials, donor  
43 organizations, community-based organizations involved in MNCH, and health care workers. Focus group  
44 discussions were conducted with women who have experience accessing MNCH services.

45 Results: Three factors contributed to the reduction in under-five mortality: national prioritization of  
46 MNCH after the civil war; roll-out and scale-up of integrated packages of services that expanded access  
47 to key interventions and promoted inter-sectoral collaborations; and community outreach and provision  
48 of MNCH services using community health workers and trained traditional midwives to expand access to  
49 care and improve referrals.

1  
2  
3 50 Conclusions: Although Liberia experiences continued challenges related to limited resources, the  
4  
5 51 strategies employed by Liberia enabling their rapid progress may provide insights for reducing under-five  
6  
7 52 mortality in other post-conflict settings.  
8  
9

10 53 Keywords: Public health, Qualitative research, Community child health < Paediatrics, International health  
11  
12 54 services < Health services administration & management  
13  
14

15 55 Strengths and limitations of this study  
16  
17

- 18 56 • Presents qualitative and quantitative data on implementation of maternal, neonatal and child  
19  
20 57 health (MNCH) interventions in Liberia, which has been understudied in Liberia.  
21  
22  
23 58 • Most studies exploring progress in child survival only present qualitative data from key  
24  
25 59 informants working within the healthcare system, but this paper also provides data from women  
26  
27 60 attempting to access services for themselves and their children in both urban and rural contexts.  
28  
29  
30 61 • For the review of national MNCH documents, policies and strategies were not issued until after  
31  
32 62 2007 due to the civil war. While these documents contained retrospective assessments of the  
33  
34 63 preceding period, assessments of the impact of more recent policies or strategies were not  
35  
36 64 available.  
37  
38  
39 65 • The qualitative data was limited to a non-random sample of participants and conducted in two  
40  
41 66 counties (one urban, one rural). It is possible that the changes in under-five mortality in these  
42  
43 67 areas do not reflect changes at the national level and that the views and experiences of some  
44  
45 68 participants do not reflect those from other areas of Liberia.  
46  
47  
48  
49

50 69 **INTRODUCTION**  
51  
52  
53  
54  
55

1  
2  
3 70 The under-five mortality rate has declined in sub-Saharan Africa from an estimated 180 deaths  
4  
5 71 per 1,000 live births in 1990 to 83 deaths per 1,000 in 2015 <sup>1</sup>, yet this was not sufficient for this region to  
6  
7 72 meet Millennium Development Goal (MDG) #4 of reducing under-five mortality by two-thirds between  
8  
9 73 1990 and 2015 <sup>2</sup>. Nevertheless, as of 2015, 12 African countries had met their MDG#4 goal <sup>1</sup>. There is  
10  
11 74 thus much interest in understanding why some countries were able to meet MDG#4 while others were  
12  
13 75 not. Liberia has witnessed a dramatic reduction in under-five mortality from 255 to 70 deaths per 1,000  
14  
15 76 live births between 1990 and 2015 (Fig 1) <sup>1</sup>. This 73% reduction in mortality rates means that Liberia  
16  
17 77 effectively met MDG#4 ahead of schedule. Infant mortality has undergone a similar 69% reduction over  
18  
19 78 the period, while neonatal mortality has declined much less rapidly.

20  
21  
22  
23  
24 79 Fig 1. Under-five, infant, and neonatal mortality rates for Liberia in 1990, 2000, 2010, and 2015 (solid  
25  
26 80 circles) with annual rates of reduction (ARR) for each period (solid and dashed lines).

27  
28 81  
29  
30 82 Source: Levels and Trends in Child Mortality: Report 2015 - Estimates Developed by the United Nations  
31  
32 83 Inter-agency Group for Child Mortality Estimation <sup>1</sup>. Report and data accessed July 2015 from  
33  
34 84 [www.childmortality.org](http://www.childmortality.org).

35  
36  
37  
38 85  
39  
40  
41 86 Liberia's accomplishments are especially notable given the 14 years of civil war, ending in 2003,  
42  
43 87 that destroyed most of Liberia's national infrastructure, eroded the country's social fabric, and cost at  
44  
45 88 least 200,000 lives. Many health facilities were destroyed, skilled personnel were lost, and essential  
46  
47 89 medicines and supplies were scarce <sup>3</sup>. Liberia emerged from this crisis with extremely limited health  
48  
49 90 infrastructure and poor maternal, neonatal and child health (MNCH) services. As a result of a strong  
50  
51 91 commitment by the Liberian government in collaboration with individuals and organizations from across  
52  
53 92 civil society, the private sector and the general public, the country made notable gains towards re-

1  
2  
3 93 establishing peace and security, revitalizing the economy, strengthening governance and the rule of law,  
4  
5 94 and rebuilding the national health infrastructure and MNCH services<sup>3</sup>. Bornemisza, et al.<sup>4</sup> describe how  
6  
7 95 the post-conflict period provides a unique opportunity for countries to address problems with their  
8  
9  
10 96 health care systems, as it is easier to create widespread change during a rebuilding period. Thus,  
11  
12 97 identifying the factors that enabled Liberia to rapidly improve MNCH services after the civil crisis can  
13  
14 98 inform other countries coming out of conflict or looking to make large-scale changes. In addition, Liberia  
15  
16 99 could use information from its post-conflict successes to inform and contribute to its own recent  
17  
18  
19 100 rebuilding efforts after the 2014-2015 Ebola virus epidemic.

20  
21  
22 101 There is a growing body of literature on MNCH in Liberia that explores the country's efforts to  
23  
24 102 implement proven MNCH interventions and expand access to care. Little research was published during  
25  
26 103 the years of the country's civil crisis and MNCH studies since have been primarily localized or  
27  
28 104 quantitative<sup>5-15</sup>. These studies focused on access and utilization of specific MNCH interventions. Much of  
29  
30  
31 105 the qualitative or mixed-methods literature from Liberia to-date has focused primarily on maternal and  
32  
33 106 reproductive health<sup>16-19</sup>. Only one of the mixed-methods studies from Liberia evaluated integration and  
34  
35 107 delivery of MNCH services<sup>20</sup>. A few studies have reported on positive outcomes of specific interventions  
36  
37 108 related to mobile data collection and monitoring<sup>21,22</sup>, and training of community health workers<sup>23</sup> and  
38  
39 109 midwives to deliver MNCH interventions at the community level<sup>24,25</sup>. There have also been recent  
40  
41  
42 110 studies examining service usage, links between aspects of the healthcare system and the West African  
43  
44 111 Ebola outbreak<sup>26-29</sup>. There thus remains much to be understood about implementation of MNCH  
45  
46 112 interventions and services and progress in reducing under-five mortality. While case studies from other  
47  
48 113 countries making significant gains in child survival such as Niger, Uganda, Malawi, Ethiopia, Rwanda, and  
49  
50  
51 114 Tanzania<sup>30-34</sup> have evaluated system-level factors contributing to their success, only Tanzania included  
52  
53 115 qualitative information from individuals attempting to access services for themselves or their children.

1  
2  
3 116 Therefore, this paper contributes to the growing literature about how progress in reducing under-five  
4  
5 117 mortality can be achieved in a resource-limited country in Sub-Saharan Africa.  
6  
7

8 118 To increase understanding of the factors influencing progress in child survival in the Africa  
9  
10 119 Region, we conducted an ecological study of factors associated with reductions in under-five mortality<sup>35</sup>,  
11  
12 120 followed by four mixed methods case studies of countries both on-track (Liberia and Zambia) and not on-  
13  
14 121 track (Kenya and Zimbabwe) to meet MDG#4<sup>36-38</sup>. Our case study of Liberia within this larger parent  
15  
16 122 study provides a notable opportunity to examine in-depth the specific factors influencing child survival in  
17  
18 123 a post-conflict setting in sub-Saharan Africa. By evaluating national policies and strategies, qualitative  
19  
20 124 data, and quantitative indicator data we identified several overarching factors, which were consistently  
21  
22 125 reported in our study data sources to have improved access and utilization of care for children under-  
23  
24 126 five, and reduced under-five mortality.  
25  
26  
27  
28

## 29 127 **METHODS**

30  
31  
32 128 The period of interest for the parent study on child survival in Africa, from which this case-study  
33  
34 129 arose, was from the beginning of the MDG movement in 2000 through 2013. The objective was to better  
35  
36 130 understand positive and negative factors influencing child survival in sub-Saharan Africa as countries  
37  
38 131 approached the end of the MDG period (2015). Prior to 2000, country-level data for these factors were  
39  
40 132 not reliably available from many African countries. This case study utilized indicator data for the years  
41  
42 133 closest to 2000, 2005, and 2013 (details below), a review of national policies and strategies issued  
43  
44 134 between 2007 and 2013, following the civil conflict, and key informant interviews and focus groups with  
45  
46 135 community women conducted in 2013.  
47  
48  
49

## 50 136 **MNCH indicator data**



1  
2  
3 137 Data were obtained on those core MNCH indicators monitored by Countdown to 2015. Most  
4  
5 138 data were obtained from the World Bank Data Catalogue<sup>39</sup>, a repository of national, regional, and global  
6  
7 139 indicator data compiled from officially-recognized sources, including national Demographic and Health  
8  
9 140 Surveys (DHS) and other national surveys. Data for indicators not readily available from the World Bank  
10  
11 141 Data Catalogue were obtained from the 2007 and 2013 Liberian DHS<sup>40,41</sup>.

12  
13  
14  
15 142 Given the scope of the larger study within which this case-study is nested, this study aimed to  
16  
17 143 include indicator data most closely corresponding to the beginning and end of the study period to enable  
18  
19 144 description of trends during the period. Unfortunately, no DHS was conducted in Liberia between 1986  
20  
21 145 and 2007 due to the civil war, resulting in substantial missing data for the time period around 2000. We  
22  
23 146 therefore also included 2007 DHS data to better visualize changes over time. Estimates were not always  
24  
25 147 available for exact years 2000, 2007, and 2013, but data were available within a one to two-year window  
26  
27 148 (see Fig 2).

### 31 149 **Review of MNCH policies and strategies**

32  
33 150 An information abstraction guide based on relevant global strategies related to child survival<sup>42-47</sup>  
34  
35 151 was developed to guide the document procurement and review process according to the following eight  
36  
37 152 content areas: 1) Health care system (including leadership, structure, human resources for health, access  
38  
39 153 & utilization, monitoring & evaluation, and accountability), 2) National health strategies and policies (and  
40  
41 154 regulations and laws, when applicable), 3) MNCH interventions, 4) Clinical standards and guidelines, 5)  
42  
43 155 Commodities and essential medicines, 6) Financial flows and resources, 7) Effective partnerships, and 8)  
44  
45 156 Other contextual factors (e.g., conflict, political environment, sanitation and hygiene, nutrition and food  
46  
47 157 security, education, and human rights).

48  
49  
50  
51  
52 158 Policies and strategies pertaining to overall national health, MNCH, and those from other sectors  
53  
54 159 related to MNCH (e.g., education, water and sanitation, and agriculture and nutrition) were obtained

1  
2  
3 160 from the WHO African Region office, the WHO country focal points for Liberia, and Liberia's Ministry of  
4  
5 161 Health (MOH; formerly Ministry of Health and Social Welfare). These documents were reviewed and any  
6  
7 162 additional documents referenced and deemed important for the review (according to the abstraction  
8  
9 163 guide) were obtained from WHO or MOH. The final list of reviewed documents can be found in S1 Table.  
10  
11  
12  
13  
14  
15  
16  
17  
18  
19  
20  
21  
22  
23  
24  
25  
26  
27  
28  
29  
30  
31  
32  
33  
34  
35  
36  
37  
38  
39  
40  
41  
42  
43  
44  
45  
46  
47  
48  
49  
50  
51  
52  
53  
54  
55  
56  
57  
58  
59  
60

For peer review only

164 Table 1. Content areas and key questions and themes related to child survival explored during the review of national health policies and  
165 strategies, key informant interview, and focus groups with community women.

| <b>Specific questions for review of national policies and strategies</b>                                                          | <b>Specific themes explored across content areas with key informants</b>                                               | <b>Specific themes explored across content areas with community women</b>                                     |
|-----------------------------------------------------------------------------------------------------------------------------------|------------------------------------------------------------------------------------------------------------------------|---------------------------------------------------------------------------------------------------------------|
| What policies and strategies related to child health were in place between 2000 and 2013 (including changes during this period)?  | Issues related to program evaluation, access and utilization, coverage, impact, and sustainability, as appropriate.    | Barriers and facilitators to accessing and utilizing MNCH services, including cultural and community factors. |
| What challenges were stated as hindering progress towards MDG#4?                                                                  | Knowledge and experiences related to MNCH across the <i>health care continuum</i> (prenatal care through age 5 years). | Experiences related to MNCH across the <i>health care continuum</i> .                                         |
| What facilitators were stated as enabling progress towards MDG#4?                                                                 | Knowledge and experiences related to MNCH across the <i>health system continuum</i> (community to tertiary hospitals). | Experiences related to MNCH across the <i>health system continuum</i> .                                       |
| What plans for change or improvements were either implemented after 2013 or were proposed as a measure to improve child survival? |                                                                                                                        |                                                                                                               |

1  
2  
3 166 Each document was reviewed by two authors (MAB, CAH) and information was recorded and  
4  
5 167 summarized according to the abstraction guide. In order to avoid biased interpretation of the  
6  
7 168 information documented, the abstracted information was reported as it was stated in the original  
8  
9  
10 169 source, and efforts were made not to overstate or minimize the original information or to add  
11  
12 170 commentary not contained in the source.  
13  
14

### 15 171 **Qualitative study procedures**

#### 16 17 18 172 Study location and participants

19  
20 173 Because important differences in MNCH often exist between urban and rural areas, participants  
21  
22 174 for the qualitative study were included from both urban and rural areas. The study design of the parent  
23  
24 175 study (consisting of four country case-studies) called for utilizing the country DHS to compare region-  
25  
26 176 specific under-five mortality rates and declines in mortality over the study period. Urban and rural sites  
27  
28 177 for the qualitative study were to be selected from the region or county whose annual rate of reduction in  
29  
30 178 under-five mortality most closely matched that of the nation as a whole. In the case of Liberia, the 1986  
31  
32 179 DHS only reported mortality for three counties, while the 2007 DHS reported mortality rates for  
33  
34 180 Monrovia and six regions comprised of three counties each<sup>41 48</sup>. As such, specific locations  
35  
36 181 representative of Liberia's progress as a nation could not be conclusively identified. Following discussions  
37  
38 182 with the in-country Primary Investigator (SBK) Monrovia (Montserrado County) was selected as the  
39  
40 183 urban location with focus groups conducted in the Paynesville and New Kru Town areas, and the areas in  
41  
42 184 and around Gbarnga (Bong County, North Central region) were chosen as the rural location with focus  
43  
44 185 groups conducted in Gbarnga and Totota. While we cannot ensure these locations experienced declines  
45  
46 186 in under-five mortality similar to Liberia as a whole, the other country case studies were often conducted  
47  
48 187 in the capital (urban site) and a nearby rural region. Bong County was selected because it was reasonably  
49  
50  
51  
52  
53  
54  
55  
56  
57  
58  
59  
60

1  
2  
3 188 accessible for conducting the study in a timely manner and was not drastically different from other areas  
4  
5 189 of the country in terms of demographics and infrastructure (including health infrastructure).

6  
7 190 Data were obtained from semi-structured, key informant interviews with Ministry of Health  
8  
9 191 (MOH) officials, donor organizations, community-based organizations (CBO) involved in MNCH, and  
10  
11 192 health care workers (HCW). Data were also obtained from four focus group discussions, two in Monrovia  
12  
13  
14 193 and two in Bong County, with women who have experience accessing MNCH services. Interviews and  
15  
16 194 focus groups were conducted between October 30 and December 19, 2013.

17  
18  
19  
20 195 Eligibility criteria and identification of study participants

21  
22  
23 196 All participants, whether key informants or focus group women, were eligible for the study if  
24  
25 197 they met the following criteria: 1) being 18 years of age or older, 2) having adequate knowledge or  
26  
27 198 experiences related to childhood survival specified for each participant group below, 3) speaking English  
28  
29 199 or Liberian English, and 4) being able to provide written informed consent. Specific inclusion criteria for  
30  
31 200 each key informant group included the following: national or provincial-level officials working in  
32  
33 201 government-level health care system administration, policy-making, program development, leadership,  
34  
35 202 or any aspect of MNCH (MOH officials); directors, managers, or other leaders of entities providing  
36  
37 203 financial or other aid for MNCH services, or international or national organizations focusing on MNCH or  
38  
39 204 having MNCH as one component of their mission (Donor organizations, DO); directors, leaders, or  
40  
41 205 managers working for a CBO involved in or providing referrals to MNCH services; and professionally  
42  
43 206 trained physicians, nurses, clinical officers, or other health-related staff working in a health facility  
44  
45 207 providing MNCH care (HCPs).

46  
47  
48  
49  
50 208 Similar numbers of participants from each key informant group were enrolled, and a range of  
51  
52 209 ages, work experiences, and positions/roles within each group was sought through the use of  
53  
54  
55 210 department registers when available. Additionally, efforts were made to balance the number of urban

211 and rural participants among the HCWs and CBO workers. Lists of potential key informants from each  
 212 group were developed by the in-country research team with assistance, as needed, from the WHO  
 213 National Professional Officer for Family Health and the MOH Deputy Programme Manager for the  
 214 Expanded Program on Immunizations. A letter signed by an official from the MOH was sent to each  
 215 potential key informant participant informing them of the purpose of the study, risks and benefits of  
 216 participation, and describing the interview process. These were followed-up with a phone call or email  
 217 from the research team to set up a meeting time for those interested. Basic demographic characteristics  
 218 of the key informants are shown in Table 2.

219  
 220  
 221 Table 2. Characteristics of key informants in Liberia.

|                         | Ministry of Health<br>(N=11) |          | Donor organization<br>(N=8) |          | Community Based Organization<br>(N=14) |          | Health Care Worker<br>(N=14) |          |
|-------------------------|------------------------------|----------|-----------------------------|----------|----------------------------------------|----------|------------------------------|----------|
| <b>Sex, N (%)</b>       |                              |          |                             |          |                                        |          |                              |          |
| Male                    | 8                            | (73)     | 5                           | (62.5)   | 10                                     | (71)     | 5                            | (36)     |
| Female                  | 3                            | (27)     | 3                           | (37.5)   | 4                                      | (29)     | 9                            | (64)     |
| <b>Age, M (IQR)</b>     |                              |          |                             |          |                                        |          |                              |          |
|                         | 45                           | (38, 55) | 40                          | (36, 49) | 40                                     | (36, 50) | 45                           | (40, 54) |
| <b>Ethnicity, N (%)</b> |                              |          |                             |          |                                        |          |                              |          |
| Bassa                   | 1                            | (9)      | 1                           | (12.5)   | 0                                      | (0)      | 0                            | (0)      |
| Grebo                   | 2                            | (18)     | 1                           | (12.5)   | 1                                      | (7)      | 2                            | (14)     |
| Kissi                   | 1                            | (9)      | 0                           | (0)      | 1                                      | (7)      | 0                            | (0)      |
| Kpelle                  | 2                            | (18)     | 1                           | (12.5)   | 4                                      | (29)     | 6                            | (43)     |
| Lorma                   | 2                            | (18)     | 0                           | (0)      | 0                                      | (0)      | 1                            | (7)      |
| Mano                    | 2                            | (18)     | 1                           | (12.5)   | 4                                      | (29)     | 1                            | (7)      |
| Other*                  | 1                            | (9)      | 4                           | (50)     | 4                                      | (29)     | 4                            | (28)     |
| <b>Education, N (%)</b> |                              |          |                             |          |                                        |          |                              |          |
| Secondary               | 1                            | (9)      | 0                           | (0)      | 0                                      | (0)      | 0                            | (0)      |

|                                                    |    |        |   |        |    |         |    |         |
|----------------------------------------------------|----|--------|---|--------|----|---------|----|---------|
| Post-secondary                                     | 10 | (91)   | 8 | (100)  | 14 | (100)   | 14 | (100)   |
| <b>Median (IQR) years working for organization</b> | 7  | (6, 9) | 1 | (1, 6) | 5  | (3, 13) | 7  | (2, 15) |

222 \* Other includes one each of Belleh, Dahn, Gbandi, Gola, and Kru; five foreign nationals (Ghana, Kenya, Nigeria,  
223 Sierra Leone, and Uganda); and 3 not reported

224 Women were recruited to participate in focus groups using informational flyers or  
225 advertisements posted in different health centers and surrounding communities. As with the key  
226 informants, a balance was sought in the level of education and participants with live and deceased  
227 children, as well as a diversity of experiences and opinions regarding access and utilization of MNCH  
228 services. Written informed consent was obtained from all enrolled participants. Community women  
229 were provided with a small monetary incentive for their participation. Basic demographic and health  
230 characteristics of the community women are shown in Table 3.

231  
232 Table 3. Characteristics of female focus group participants in Liberia.

|                         | Rural participants<br>(N=16) |            | Urban participants<br>(N=21) |          |
|-------------------------|------------------------------|------------|------------------------------|----------|
| <b>Age, M (IQR)</b>     | 26                           | (22, 32.5) | 28                           | (21, 38) |
| <b>Ethnicity, N (%)</b> |                              |            |                              |          |
| Kpelle                  | 12                           | (75)       | 1                            | (5)      |
| Lorma                   | 2                            | (13)       | 2                            | (10)     |
| Bassa                   | 0                            | (0)        | 9                            | (43)     |
| Kru                     | 0                            | (0)        | 7                            | (33)     |
| Vai                     | 0                            | (0)        | 2                            | (10)     |
| Other*                  | 2                            | (13)       | 0                            | (0)      |
| <b>Education, N (%)</b> |                              |            |                              |          |
| None                    | 2                            | (14)       | 2                            | (10)     |

|                                                       |      |               |      |              |
|-------------------------------------------------------|------|---------------|------|--------------|
| Primary                                               | 7    | (50)          | 5    | (24)         |
| Secondary                                             | 3    | (21)          | 13   | (62)         |
| Post-secondary                                        | 2    | (14)          | 1    | (5)          |
| <b>Travel time to health care (dry season), N (%)</b> |      |               |      |              |
| Less than one hour                                    | 15   | (94)          | 19   | (90)         |
| One to two hours                                      | 0    | (0)           | 2    | (10)         |
| More than two hours                                   | 1    | (6)           | 0    | (0)          |
| <b>Number of living children, M (IQR)</b>             | 1    | (1, 3)        | 2    | (1, 4)       |
| <b>Age of youngest child, M (IQR)</b>                 | 2 yr | (11 mo, 4 yr) | 2 yr | (1 yr, 3 yr) |
| <b>Any children who died &lt;5yrs old, N (%)</b>      |      |               |      |              |
| No                                                    | 12   | (80)          | 12   | (57)         |
| Yes                                                   | 3    | (20)          | 9    | (43)         |
| <b>Place of delivery for latest pregnancy, N (%)</b>  |      |               |      |              |
| Health facility                                       | 16   | (100)         | 17   | (81)         |
| Home                                                  | 0    | (0)           | 4    | (19)         |
| <b>Birth attendant for latest pregnancy, N (%)</b>    |      |               |      |              |
| Doctor                                                | 2    | (13)          | 3    | (14)         |
| Nurse/midwife                                         | 14   | (88)          | 17   | (81)         |
| Traditional birth attendant                           | 0    | (0)           | 1    | (5)          |

233 \* Other includes one each Kisii and Mandingo

234 Interview and discussion guides

235 Interview guides for key informants and discussion guides for focus groups with community

236 women were developed, pilot tested through cognitive interviewing<sup>49</sup>, and revised as needed. The

237 guides focus on barriers to and facilitators for improving child survival in areas related to MNCH (Table

238 1), corresponding to the structure for the review of national health policies and strategies. Not all



1  
2  
3 239 content areas were appropriate for each key informant group, but each topic was asked of at least two  
4  
5 240 of the four groups. Focus group discussions with community women focused only on the health care  
6  
7 241 system, MNCH interventions, medicines, and contextual factors content areas. While participants could  
8  
9 242 discuss the entire period from 2000 forward, most participants recalled more recent information and  
10  
11 243 experiences.  
12  
13  
14

#### 15 244 Data collection

16  
17  
18 245 Key informant interviews were conducted in English by one research assistant using the  
19  
20 246 appropriate interview guide and were audio recorded. The focus group discussions were conducted in  
21  
22 247 Liberian English and also audio recorded. Two research assistants were present at each focus group to  
23  
24 248 facilitate discussion and note-taking.  
25  
26

27 249 Following completion of the interviews and focus groups, audio recordings were transcribed by  
28  
29 250 the research assistants and field notes incorporated into the transcript. Transcripts were coded and  
30  
31 251 analyzed using the software Atlas.ti (Atlas.ti Scientific Software Development GmbH, Berlin, Germany)<sup>50</sup>.  
32  
33 252 Deductive themes were determined *a priori* based on interview guides and key topics of interest based  
34  
35 253 on literature review. Additional themes were also identified upon review of the transcripts. Text was  
36  
37 254 coded and reviewed for patterns of consistency, variation, relationships between themes and exemplary  
38  
39 255 cases or quotations<sup>51,52</sup>. Ethical approval for the qualitative portion of the study was obtained from the  
40  
41 256 Vanderbilt University Medical Center and the University of Liberia-Pacific Institute for Research and  
42  
43 257 Evaluation.  
44  
45  
46  
47

#### 48 258 Patient involvement

49  
50  
51  
52  
53  
54  
55  
56  
57  
58  
59  
60

1  
2  
3 259 Patients were not involved in the design of this study. Results were disseminated to Ministry of Health  
4  
5 260 and WHO representatives from Liberia, and a presentation and report detailing results were made  
6  
7 261 available to these representatives to aid further dissemination to other stakeholders.  
8  
9

## 10 262 **RESULTS**

### 11 12 13 263 **MNCH coverage Indicators** 14 15 264

16  
17 265 Indicator coverage data from 2000 were not available for six of the thirteen core indicators  
18  
19 266 shown in Fig 2. Liberia has improved coverage of nine of these indicators during the study period.  
20  
21 267 Highest current indicator coverage is seen for pregnant women receiving antenatal care (ANC) (96%),  
22  
23 268 vitamin A supplementation (88%), pregnant women receiving at least four ANC visits (78%), and  
24  
25 269 improved water sources (75%; Fig 2). Coverage was below 50% for improved sanitation (17%), postnatal  
26  
27 270 visits within two days for all deliveries (35%), use of insecticide treated bednets (38%), and diarrhea  
28  
29 271 treatment (46%; Fig 2).  
30  
31  
32

33 272 Fig 2. Changes in child survival indicator coverage in Liberia, 2000, 2007, and 2013\*.  
34  
35

36 273 \*Estimates were not always available for years 2000, 2007, and 2013, in which case the nearest estimate  
37  
38 274 between 1999 and 2000, 2005 and 2007, or 2012 and 2013 was used; data were not available for the six  
39  
40 275 indicators showing an asterisk (\*) during the 2000 time period.  
41

42 276 †Among all births, both inside and outside a health facility  
43

44  
45 277 ‡Children 12-23 months old who have received BCG, measles and three doses each of DPT and polio  
46  
47 278 vaccine (excluding polio vaccine given at birth)  
48

49 279 §Children under 5 receiving oral rehydration and continued feeding  
50

51 280 Source: World Development Indicators Data Catalogue from the World Bank  
52

53  
54 281 (<http://datacatalog.worldbank.org>; accessed August 2015) and Liberia DHS  
55

1  
2  
3 **282 National document review and qualitative study**  
4

5  
6 **283 National Prioritization of MNCH**  
7

8  
9 **284** Both national documents and key informants at nearly all levels highlighted the strong  
10  
11 **285** commitment the Liberian government made to re-building the health care system soon after the civil  
12  
13 **286** war ended. Key informants and national documents also described how MNCH was prioritized, not just  
14  
15 **287** within the MOH, but also by top leadership throughout all sectors of the government. As an example of  
16  
17 **288** Liberia's high level commitment to MNCH, key informants described how maternal and neonatal deaths  
18  
19 **289** were reported to the president of Liberia. Routine audits of maternal and neonatal deaths were also  
20  
21 **290** undertaken by county health boards to identify problems with care, and improve accountability and  
22  
23 **291** oversight. Community women rarely specifically commented on the government's prioritization of  
24  
25 **292** MNCH, but some did express appreciation for the government's role in rebuilding services after the  
26  
27 **293** conflict. This prioritization of MNCH by multiple levels in the government is illustrated in the quotations  
28  
29 **294** below:  
30  
31  
32  
33

34 **295** "I mean it has been a painfully slow process, due to advocacy, to get government to that level of  
35  
36 **296** commitment but a lot of progress, a lot of gain has been made and I can tell you for instance now  
37  
38 **297** the President of Liberia is the president of the commission for women health in Africa and that's  
39  
40 **298** under the WHO-AFRO, I can tell you that the government had launched, had made maternal and  
41  
42 **299** newborn health one of the conditions that will undergo surveillance, meaning that maternal  
43  
44 **300** death should be reported, maternal and newborn death should be reported." (49 year old, male  
45  
46 **301** donor partner)  
47  
48  
49

50 **302** "...I think all the things we do medication and everything government has been involved [in]...if  
51  
52 **303** you have anybody dying from giving birth they have this audit in this particular team that reports  
53  
54  
55

1  
2  
3 304 directly to the President of Liberia, so they are even involved in it..." (35 year old, female from  
4  
5 305 CBO partner)  
6  
7

8 306 "[NGOs and the government] are giving us knowledge [on] how to take care of ourselves and  
9  
10 307 what to do when you are pregnant, where to go and where not to go and what for you to eat...I  
11  
12 308 think, things have improved, because we having NGOs, we having government, we having UN,  
13  
14 309 many people coming in they helping us too. So things have improved bit by bit." (39 year old,  
15  
16  
17 310 rural woman with 4 children)  
18  
19

20 311 Although child health has been recognized as an important priority by both the Liberian  
21  
22 312 government and donor partners working with Liberia, national health documents and key informant  
23  
24 313 interviews all indicated consistent concern that Liberia's high dependence on donor aid is unsustainable.  
25  
26 314 Due to strong donor funding and some government funding, most MNCH services were free during much  
27  
28 315 of the study period. Key informants and community women felt that the free services had contributed to  
29  
30 316 increased access and utilization. However, key informants and national documents indicated that the  
31  
32 317 government of Liberia needs to institutionalize services currently provided by external partners and take  
33  
34 318 more financial responsibility for the health sector.  
35  
36  
37

38 319 "...we are donor dependent; the sources of funding either from the donor or the GOL  
39  
40 320 [Government of Liberia] but what comes into the ministry for maternal and child health issue is  
41  
42 321 very small but the input that partners are making if you count it, it's very huge. So we think that  
43  
44 322 for sustainability the government needs to play more roles because if these partners leave, the  
45  
46 323 gains that we are making, to sustain it might be difficult..." (46 year old, female MOH official)  
47  
48  
49

50 324 The Development and Implementation of Integrated Packages of Services  
51  
52  
53  
54  
55  
56  
57  
58  
59  
60

1  
2  
3 325 Key informants indicated that the MOH did a good job of implementing extensive reforms of the  
4  
5 326 health system soon after the civil war, as well as continuously attempting to evaluate and update policies  
6  
7 327 and strategies to make gradual improvements. An often-cited example by key informants of this process  
8  
9 328 was the implementation of integrated packages of services, detailed in the quotations below:  
10  
11

12 329 "...I think there is an enabling environment from the government through the Ministry of Health  
13  
14 330 that is in place through the development of the ten years plan and the expanded program which  
15  
16 331 is the EPHS [Expanded Package of Health Services], which addresses child health and maternal  
17  
18 332 health, so first there is a will on the part of the government to address child health and maternal  
19  
20 333 health in the country." (49 year old, female donor partner)  
21  
22  
23

24 334  
25  
26 335 "...the Ministry of Health, from the beginning a postwar country had a policy first that was  
27  
28 336 guiding the process; the BPHS [Basic Packages of Health Services]...So it had bases on how people  
29  
30 337 should implement the policy and also as time went by, maternal services improved over time  
31  
32 338 based on evaluation from the Ministry of Health and Social Welfare through their annual  
33  
34 339 accreditation looking at service delivery." (35 year old, male donor partner)  
35  
36  
37

38 340 The National Health Policy and Plan <sup>53</sup> focused on establishing the Basic Package of Health  
39  
40 341 Services (BPHS). National documents and key informants attributed rapid scale-up of MNCH  
41  
42 342 interventions immediately following the civil war to the effective framework set forth by the BPHS.  
43  
44 343 According to national documents, the BPHS also aimed to improve distribution and supervision of  
45  
46 344 healthcare providers through establishment of a salary scale, standardized job descriptions, and  
47  
48 345 supervision tools for all cadres. Although the BPHS is credited with restoring MNCH service delivery  
49  
50 346 across Liberia, several key informants stated that the BPHS did not adequately integrate services across  
51  
52 347 different sectors of MNCH, which they felt hindered delivery of maternal health and family planning,  
53  
54  
55

1  
2  
3 348 nutrition and PMTCT. Additionally, components of the BPHS intended to improve human resources for  
4  
5 349 health were not fully implemented or did not appear to have the intended impact, as many key  
6  
7 350 informants and community women cited continued human resource issues such as a lack of qualified and  
8  
9 351 quality providers.

11  
12 352 Recognizing the shortcomings of the BPHS, the National Health and Social Welfare Policy and  
13  
14 353 Plan<sup>54</sup> was developed and established the Essential Package of Health Services (EPHS) which aimed to  
15  
16 354 scale-up interventions (especially MNCH interventions), reduce inequities, improve collaboration across  
17  
18 355 different sectors, and improve quality at secondary and tertiary healthcare centers. The EPHS also sought  
19  
20 356 to increase the number of skilled workers available for labor and delivery to ensure that emergency  
21  
22 357 obstetric and neonatal care (EmONC) is available at all facilities. Key informants were quite positive  
23  
24 358 about the EPHS, feeling that it had improved collaboration between sectors and had improved quality of  
25  
26 359 care in some areas. Some key informants also felt that the clearer language in the policy documents  
27  
28 360 enabled the government to better set expectations and hold partners accountable when implementation  
29  
30 361 goals were not met.

31  
32  
33 362 "...from the BPHS to EPHS, it was EPHS they were able to strengthen that MCH part to include in  
34  
35 363 addition to nutrition, adolescence, reproductive health care and all of that sexual health but in  
36  
37 364 the past, those were very weak and gray areas; as long as the policy did not address them, they  
38  
39 365 became difficult for anyone to hold a partner accountable for any implementation. Uh, now, the  
40  
41 366 ministry has included that and there are more services." (47 year old, male CBO partner)

42  
43  
44 367 However, some key informants felt that the EPHS had not been completely implemented at all  
45  
46 368 levels, particularly the primary care level, due to lack of resources, both human and financial. The  
47  
48 369 incomplete implementation limits not only delivery of MNCH interventions, but also the collaboration  
49  
50 370 and coordination the EPHS was intended to promote. In addition, both key informants and some

1  
2  
3 371 community women described continued shortages of healthcare providers, especially those trained in  
4  
5 372 delivery-related interventions, certified midwives, and pediatric specialists outside the capital of  
6  
7 373 Monrovia. As illustrated in the quotations below, community women and key informants noted that  
8  
9 374 limited availability of MNCH providers and poor attitudes of providers remained a barrier to utilizing and  
10  
11  
12 375 accessing care.

13  
14  
15 376 "...When I gave birth, the girl that attended to me because she left, her shift was over and she  
16  
17 377 left...that night I could die because I started bleeding right after giving birth. But because my  
18  
19 378 friend was a nurse she went there and attended to me that night. Those that were on shift that  
20  
21 379 night... never had time for me because nothing was there for me to tip in, so they just acted  
22  
23  
24 380 careless on [with] me." (38 year old, urban woman with 4 children)

25  
26  
27 381  
28  
29 382 "Clinics are...not running twenty- four seven services, we have heard these challenges from them,  
30  
31 383 people go overnight with complaints and the health care provider says I am not paid for  
32  
33 384 overnight services so you have to wait until tomorrow; so lack of motivation at the service  
34  
35 385 provider end is also impeding the process." (37 year old, male CBO partner)

36  
37  
38 386  
39  
40  
41 387 Although key informants were concerned about incomplete implementation of the EPHS, they  
42  
43 388 attributed improvements in malaria, PMTCT services, nutrition and reproductive health to the improved  
44  
45 389 integration between sectors that the EPHS provided, as illustrated in the quotations below. Community  
46  
47  
48 390 women did not specifically describe implementation of the EPHS or differentiate between levels of the  
49  
50 391 healthcare system, but did discuss the quality of care they received at the facilities. Specifically, women  
51  
52 392 felt very positive about the care received during pregnancy and delivery, as well as educational and  
53  
54  
55 393 preventive services provided at facilities.

1  
2  
3 394 “...I think it has changed over the period because, in the past we had the BPHS that provided  
4  
5 395 minimum service at the health facility where when the pregnant woman comes, they only check  
6  
7 396 them and when they have malaria, they treat them and they go home. But this time around, the  
8  
9  
10 397 BPHS has been modified to EPHS and where, we look at a full package, the standards have  
11  
12 398 improved, the services have improved and they receive a whole package and deliver it to the  
13  
14 399 mother... [including] PMTCT services, immunization, nutrition, and other laboratory findings so as  
15  
16 400 to reduce the number of visits, she has to do at the health facility.” (33 year old, male MOH  
17  
18 401 official)

19  
20  
21 402 “...the nurses and the doctors especially at the hospital here, whenever they carry pregnant  
22  
23 403 woman there, they always cater to the person and talk [to] the person in a polite manner, try to  
24  
25 404 help the person...They always treat us free and at time [delivery] they give baby’s clothes free of  
26  
27  
28 405 charge.” (43 year old, rural woman with 6 children)

29  
30 406  
31  
32  
33 407 “...when you give birth and the baby is growing up, you don’t have to wait for the child to fall sick  
34  
35 408 before you carry the child to hospital. You can take the child to hospital so the child will get  
36  
37 409 drugs [anti-malaria prophylaxis]...” (35 year old, urban woman with 4 children)

38  
39 410  
40  
41 411 Community outreach and service delivery

42  
43  
44 412 Liberia’s use of community outreach and service delivery was a third overarching factor  
45  
46 413 identified as facilitating achievement of MDG#4. The national Community Health Services Policy first  
47  
48 414 issued in 2008 and revised in 2011<sup>55</sup> outlined a standard set of outreach, health promotion and referral  
49  
50 415 services and specified the roles and responsibilities of community-based staff including general  
51  
52 416 community health volunteers (GCHVs) and Trained Traditional Midwives (TTMs). It further outlined how  
53  
54 417 they should be distributed geographically, supervised, evaluated, and that TTMs are to be compensated



1  
2  
3 418 with monthly salaries while GCHVs work as volunteers but receive an incentive package. Both key  
4  
5 419 informants and community women were positive about their efforts at the community level, recognizing  
6  
7 420 how these cadres enhance referrals from the community to healthcare facilities and follow-up with  
8  
9 421 mothers and children in the community after they return home. GCHVs and TTMs were also highly  
10  
11 422 valued by community women for their assistance with the outreach campaigns “Reach Every District”  
12  
13 423 (RED) and “Reach Every Pregnancy” (REP), which were intended to improve immunization coverage and  
14  
15 424 maternal health, respectively. Both key informants and community women further described that GCHVs  
16  
17 425 and TTMs had likely increased coverage of antenatal and post-natal care by connecting women with the  
18  
19 426 healthcare system earlier in pregnancy and increased immunization coverage through outreach with  
20  
21 427 mobile vaccination sites, and improved education and communication.

22  
23  
24  
25  
26 428 “...the vaccine team most of the time come around to give our children vaccine and deworm  
27  
28 429 them with the medicine. At time we can see some people with the megaphone  
29  
30 430 educating...pregnant women on how to take care of your children and even how to take care of  
31  
32 431 your community. As for the health campaign we can see them and we can benefit from them.”  
33  
34 432 (38 year old, urban woman with 3 children)

35  
36  
37  
38 433 “Number one thing that is trying to work well is the TTMs and GCHVs, they are trying their best  
39  
40 434 with the referrals. They get any patient in the community, they bring them here... we have family  
41  
42 435 planning, we have EPI under MCH, we have PMTCT, ANC, labor and delivery, post-partum care  
43  
44 436 provided and ANC...and also do STI [testing] too...malaria...The only problem we have with our  
45  
46 437 GCHVs is that they are saying they are not been compensated so we don’t expect them to work  
47  
48 438 full time.” (43 year old, female health care worker)

49  
50  
51  
52 439 While attributing success at the community level to the efforts of GCHVs and TTMs, study  
53  
54 440 participants also felt these staff needed better compensation beyond what is currently provided to

1  
2  
3 441 enable them to work more often. The insufficient number of GCHVs and TTMs was also cited as a  
4  
5 442 challenge affecting availability of health services. Key informants and national documents noted that due  
6  
7 443 to limited human and financial resources, local health clinics were not always staffed and community-  
8  
9 444 based interventions such as the RED and REP campaigns had not been implemented or adequately  
10  
11 445 supported in all areas.  
12  
13  
14

15 446 “...I remember some time ago they were trying to integrate the...reach every pregnant women;  
16  
17 447 reach every district, that is for the supervision for vaccine...but for the reach every pregnant  
18  
19 448 woman actually it is not working 100%. If I will have to grade it may be it is working around 40 to  
20  
21 449 45% because of may be some supplies that supposed to be given or put into place it is not into  
22  
23 450 place so for that it is not 100%.” (34 year old, female CBO partner)  
24  
25  
26

## 27 451 **DISCUSSION**

28  
29

30 452 This case study identifies three components that have likely contributed to Liberia’s rapid post-  
31  
32 453 conflict decline in under-five mortality and attainment of MDG#4. First, the Liberian government made  
33  
34 454 re-establishment and funding of MNCH a top priority as it rebuilt its health system after the civil war.  
35  
36 455 Second, the development and implementation of integrated packages of services, first the BPHS followed  
37  
38 456 by the EPHS, enabled Liberia to restore basic MNCH services and interventions at all levels of the  
39  
40 457 healthcare system. The development and implementation of the BPHS and EPHS also demonstrated  
41  
42 458 Liberia’s ability to evaluate and re-work policies and strategies. The EPHS fostered further integration  
43  
44 459 and collaboration across multiple sectors, which allowed for expansion of PMTCT, nutrition, and other  
45  
46 460 MNCH services. The EPHS also sought to improve the availability of trained health workers and fully  
47  
48 461 functional health units, although challenges persisted despite these efforts. Third, provision of services at  
49  
50 462 the community level, such as outreach campaigns and use of GCHVs and TTMs to deliver basic MNCH  
51  
52 463 interventions, contributed to improved coverage of ANC, post-natal care, and immunizations, and also  
53  
54  
55  
56  
57  
58  
59  
60

1  
2  
3 464 improved access and continuity of care in post-conflict Liberia by strengthening referrals between the  
4  
5 465 community and healthcare facilities. Each of these components is supported by the qualitative data  
6  
7 466 collected.

9  
10 467 Liberia utilized a healthcare system recovery approach that has shown promise in other post-  
11  
12 468 conflict or conflict-affected settings. Specifically, Kruk, et al. (2010) emphasize the need for strong  
13  
14 469 national leadership and governance that makes restoration of basic health services a top national  
15  
16 470 priority. They also documented that, when a national government makes a strong commitment to  
17  
18 471 providing healthcare to the most vulnerable populations (such as mothers and children), this  
19  
20 472 commitment can contribute to the country's long-term stability and recovery efforts. A basic package of  
21  
22 473 health services enabling rapid roll-out and scale-up of MNCH and other primary health services has also  
23  
24 474 been deployed with some success in Afghanistan, South Sudan, Rwanda, and Bosnia and Herzegovina<sup>56-</sup>  
25  
26 475<sup>60</sup>, and is specifically recommended for conflict-affected settings<sup>4 12</sup>. These packages of services typically  
27  
28 476 include key maternal, neonatal, and child health interventions, nutrition, and treatment for  
29  
30 477 communicable diseases (such as TB and HIV)<sup>56-62</sup>. Afghanistan, similar to Liberia, revised their basic  
31  
32 478 package to also include additional services (for disability and mental health), recognizing the specific  
33  
34 479 needs of their population and the gaps in their original package. Researchers have suggested that basic  
35  
36 480 packages of services may help in initial scale-up and improvements, but require additional inputs and  
37  
38 481 adjustments to sustain these improvements<sup>56 57 59 63</sup>.

39  
40 482 Community-level education, empowerment, and outreach are also recommended to improve  
41  
42 483 utilization and access to basic interventions and improve referrals from the community to the facility  
43  
44 484 levels<sup>4 64-67</sup>. Expanding cadres of traditional birth attendants and community health workers has been  
45  
46 485 found to be particularly key in restoring maternal and neonatal services in conflict-affected settings<sup>56 68-</sup>  
47  
48 486<sup>72</sup>. Community health workers and community-level outreach and service delivery has also been a key  
49  
50 487 factor in the successes of other countries successfully reducing child mortality<sup>30-34 38 73</sup>. Although many

1  
2  
3 488 conflict-affected settings have difficulties with referrals<sup>64 74 75</sup>, this is one area where Liberia appears to  
4  
5 489 have made great progress through their use of GCHVs and TTMs, as described by key informants and  
6  
7 490 community women.

9  
10 491 Although Liberia has made significant progress in MNCH, national documents and study  
11  
12 492 participants noted a number of challenges that persist and need to be addressed as Liberia moves  
13  
14 493 forward to achieve their post-2015 goals<sup>76</sup>. This includes a shortage of healthcare providers, particularly  
15  
16 494 community-based midwives and pediatricians in rural areas, where the available providers are often  
17  
18 495 overburdened. The lack of healthcare providers and challenges associated with training and retaining  
19  
20 496 general and MNCH providers is well-documented in the literature from other conflict-affected countries  
21  
22 497 where brain-drain is common during and after conflict<sup>4 12 56 64 66 77-80</sup>. Another weakness described in the  
23  
24 498 study is Liberia's high dependence on donor aid to provide many of the MNCH services. Although heavy  
25  
26 499 reliance on donor aid is consistent with other conflict-affected countries, there is little consensus on how  
27  
28 500 donors can best support post-conflict countries and few recommendations as to how and when post-  
29  
30 501 conflict settings should make the transition from donor-provided services to government-provided  
31  
32 502 services<sup>81-83</sup>.

33  
34  
35  
36 503 This study provides one of the few country-case studies to assess progress towards achieving  
37  
38 504 MDG#4. Perhaps more importantly, it provides much needed insight into MNCH infrastructure and  
39  
40 505 experiences from an understudied, post-conflict, yet highly successful African country. This case-study  
41  
42 506 utilized a number of data sources, including national indicator data, country-authored health policies and  
43  
44 507 strategies, and qualitative data from key informants with different roles in MNCH and four focus group  
45  
46 508 discussions with women from urban and rural areas. By bringing together such diverse sources of data,  
47  
48 509 this study was able to assess the national-level measures used to enhance child survival and the  
49  
50 510 facilitators and challenges that affected full implementation and impact.

1  
2  
3 511            Nevertheless, there are limitations for each of the study components. For the review of national  
4  
5 512 MNCH policies and strategies, new policies and strategies were not issued until after 2007 due to the  
6  
7 513 civil war. While these documents contained a retrospective assessment of the preceding period that  
8  
9 514 provided a comprehensive understanding of the earlier part of the study period, assessments of the  
10  
11 515 impact of more recent policies or strategies were not yet available. Moreover, country policies and  
12  
13 516 strategies covered different and sometimes overlapping time periods, making it difficult to distinguish  
14  
15 517 current from outdated information, and whether a stated plan had been implemented unless stated in a  
16  
17 518 document. Input from co-authors affiliated with the WHO and the MOH helped to clarify uncertainty.  
18  
19

20  
21 519            With regards to the interviews and focus groups, this study was limited to a non-random sample  
22  
23 520 of participants and conducted in two counties (one urban, one rural). It is possible that the changes in  
24  
25 521 under-five mortality in these areas do not reflect changes at the national level and that the views and  
26  
27 522 experiences of some participants do not reflect those from other areas of Liberia. However, participants  
28  
29 523 were selected to represent five different cadres of individuals who could share a diversity of MNCH  
30  
31 524 experiences, including some key informants with national-level responsibilities and 37 women from the  
32  
33 525 community. In addition, although we asked participants to reflect on long-term changes, most of the  
34  
35 526 participants recalled their current experiences and opinions on MNCH.  
36  
37

38  
39 527            In spite of these limitations, this study contributes to the growing literature on effective  
40  
41 528 approaches to scaling-up availability and use of MNCH services in conflict-affected settings. The factors  
42  
43 529 identified as contributing to Liberia's success in reducing under-five mortality can be applied in the many  
44  
45 530 other countries recovering from conflict, and can also be used to help Liberia recover from the 2014-  
46  
47 531 2015 Ebola epidemic. To further improve the delivery of essential health services and reduce under-five  
48  
49 532 mortality in the post-2015 era, Liberia needs to maintain its prioritization of the health and welfare of  
50  
51 533 pregnant women and children, continue to conduct comprehensive evaluation and enhancement of  
52  
53  
54  
55  
56  
57  
58  
59  
60

1  
2  
3 534 programs and interventions, and ensure sufficient human and financial resources are consistently  
4  
5 535 available to ensure MNCH services are available close to the population.  
6  
7  
8 536  
9  
10 537

## 11 538 Acknowledgements

13 539 We thank the African Region of the World Health Organization for their support for this research and the  
14 540 research participants for sharing their time, experiences and opinions. The research assistants for the  
15 541 qualitative portion of the study were Wede M. Nagbe and Curtis H. Taylor who conducted and  
16 542 transcribed the interviews and focus group discussions.

## 18 543 Funding

20 544 AC is an employee of Liberia's Ministry of Health. PH and KM are employees of the World Health  
21 545 Organization. No other authors have competing interests. Funding for this project was provided by the  
22 546 World Health Organization Regional Office for Africa. Support for data management came from the  
23 547 Vanderbilt Institute for Clinical and Translational Research (grant UL1 TR000445 from the National  
24 548 Center for Advancing Translational Sciences at the National Institutes of Health). At the time of the  
25 549 study, Dr. Kipp was a Scholar with the HIV/AIDS, Substance Abuse, and Trauma Training Program (HA-  
26 550 STTP), at the University of California, Los Angeles; supported through an award from the National  
27 551 Institute on Drug Abuse at the National Institutes of Health (R25 DA035692).

## 30 552 Authors' contributions

31 553 Brault: Involved in conceptualization of research, development of methodology, data collection, data  
32 554 analysis, data management, and manuscript development.

34 555 Kennedy: Involved in development of methodology, data collection, data management, and manuscript  
35 556 development.

37 557 Haley: Involved in conceptualization of research, development of methodology, data collection, data  
38 558 analysis, data management, and manuscript development.

39 559 Clarke: Involved in development of methodology, provision of study resources, and manuscript  
40 560 development.

41 561 Duworko: Involved in development of methodology, provision of study resources, and manuscript  
42 562 development.

43 563 Habimana: Involved in conceptualization of research, development of methodology, funding acquisition,  
44 564 and manuscript development.

45 565 Vermund: Involved in conceptualization of research, development of methodology, funding acquisition,  
46 566 and manuscript development.

47 567 Kipp: Involved in conceptualization of research, project administration, development of methodology,  
48 568 funding acquisition, data collection, data analysis, data management, and manuscript development.

1  
2  
3 569 Mwinga: Involved in conceptualization of research, project administration, development of  
4 570 methodology, funding acquisition, provision of study resources, and manuscript development.

5  
6 571 Data sharing statement

7  
8 572 Annual mortality estimates used in Figure 1 are publicly available, without restriction, from  
9 573 [http://www.childmortality.org/index.php?r=site/graph#ID=LBR\\_Liberia](http://www.childmortality.org/index.php?r=site/graph#ID=LBR_Liberia). Indicator data used for Figure 2  
10 574 are publicly available, without restriction, from the World Development Index, Africa Development  
11 575 Index, and Health Nutrition & Population Statistics databases of the World Bank Data Catalog  
12 576 (<http://data.worldbank.org/data-catalog/>) or Liberia Demographic and Health Survey reports available at  
13 577 [http://dhsprogram.com/Where-We-Work/Country-Main.cfm?ctry\\_id=22&c=Liberia&r=1](http://dhsprogram.com/Where-We-Work/Country-Main.cfm?ctry_id=22&c=Liberia&r=1). A detailed  
14 578 description of each indicator's source can be found in the supplemental material from a previously  
15 579 published study (Kipp et al. BMJ Open. 2016. <http://dx.doi.org/10.1136/bmjopen-2015-007675>).

16  
17  
18 580 Supplemental table S1 lists the national documents reviewed for the study. These were obtained with  
19 581 the permission and assistance of the Liberian co-authors and do not belong to any of the individual study  
20 582 authors. As such, they cannot be made available as they belong to the Ministry of Health or other  
21 583 agencies and some are still in draft form. Links to publicly available documents are provided in  
22 584 Supplemental table S1. For investigators wishing to obtain other policy documents used in this study,  
23 585 please contact Mr. Luke Bawo, Coordinator for Research and Health Management Information System,  
24 586 Ministry of Health, email: [lukebawo@gmail.com](mailto:lukebawo@gmail.com); or Hon. C. Sanford Wesseh, Assistant Minister for Vital  
25 587 Statistics, Ministry of Health, email: [cswesseh@yahoo.com](mailto:cswesseh@yahoo.com).

26  
27  
28  
29 588 Under the Agreement for Performance of Work with the World Health Organization (sponsor) that was  
30 589 used for this study, all rights to the data collected from key informants and community women belong to  
31 590 the WHO. The WHO will entertain any reasonable proposal for use of the data. Researchers who are  
32 591 qualified to manage and analyze qualitative data may request these data from Dr. Phaniel Habimana,  
33 592 Team Leader, Child and Adolescent Health and Nutrition, WHO Regional Office for Africa, Brazzaville,  
34 593 Congo; email: [habimanap@who.int](mailto:habimanap@who.int).

35  
36  
37 594 Interview, focus group discussion, and national document abstraction guides are available upon request  
38 595 from the corresponding author; email: [aaron.kipp@vanderbilt.edu](mailto:aaron.kipp@vanderbilt.edu). These data are not considered part  
39 596 of the underlying data necessary to replicate the study.

40  
41 597

42  
43 598  
44  
45  
46  
47  
48  
49  
50  
51  
52  
53  
54  
55  
56  
57  
58  
59  
60

## 599 REFERENCES

- 600 1. UNICEF, WHO, World Bank, et al. Levels and Trends in Child Mortality: Report 2015 - Estimates  
601 Developed by the United Nations Inter-agency Group for Child Mortality Estimation. New York:  
602 UNICEF. (accessed July 2015 from [www.childmortality.org](http://www.childmortality.org)), 2015.
- 603 2. United Nations. United Nations Millenium Declaration: United Nations; 2000 [Available from:  
604 <http://www.un.org/millennium/declaration/ares552e.htm> accessed February 2013.
- 605 3. Liberia Ministry of Health and Social Welfare (MoHSW). Country Situational Analysis Report.  
606 Monrovia, Liberia: Ministry of Health and Social Welfare 2011.
- 607 4. Bornemisza O, Ranson MK, Poletti TM, et al. Promoting health equity in conflict-affected fragile states.  
608 *Soc Sci Med* 2010;70(1):80-8. doi: 10.1016/j.socscimed.2009.09.032
- 609 5. Tubman VN, Marshall R, Jallah W, et al. Newborn Screening for Sickle Cell Disease in Liberia: A Pilot  
610 Study: Newborn Screening for Sickle Cell in Liberia. *Pediatric Blood & Cancer* 2016;63(4):671-76.  
611 doi: 10.1002/psc.25875
- 612 6. Tsai C, Walters C, Sampson J, et al. Pediatric Mortality in a Rural Tertiary Care Center in Liberia.  
613 *Children* 2017;4(2):8. doi: 10.3390/children4020008
- 614 7. Sipsma H, Callands TA, Bradley E, et al. Healthcare utilisation and empowerment among women in  
615 Liberia. *Journal of Epidemiology and Community Health (1979-)* 2013;67(11):953-59. doi:  
616 10.1136/jech-2013-202647
- 617 8. Luginaah IN, Kangmennaang J, Fallah M, et al. Timing and utilization of antenatal care services in  
618 Liberia: Understanding the pre-Ebola epidemic context. *Social science & medicine* 2016;160:75-  
619 86. doi: 10.1016/j.socscimed.2016.05.019
- 620 9. Kenny A, Basu G, Ballard M, et al. Remoteness and maternal and child health service utilization in rural  
621 Liberia: A population-based survey. *JOURNAL OF GLOBAL HEALTH* 2015;5(2):48-59. doi:  
622 10.7189/jogh.05.020401
- 623 10. Gartland MG, Taryor VD, Norman AM, et al. Access to facility delivery and caesarean section in north-  
624 central Liberia: a cross-sectional community-based study. *BMJ open* 2012;2(6):e001602.
- 625 11. Kentoffio K, Kraemer JD, Griffiths T, et al. Charting health system reconstruction in post-war Liberia: a  
626 comparison of rural vs. remote healthcare utilization. *BMC HEALTH SERVICES RESEARCH*  
627 2016;16(1):478. doi: 10.1186/s12913-016-1709-7
- 628 12. Kruk ME, Rockers PC, Williams EH, et al. Availability of essential health services in post-conflict  
629 Liberia. *Bulletin of the World Health Organization* 2010;88(7):527-34. doi:  
630 10.2471/BLT.09.071068
- 631 13. Lori JR, Rominski S, Osher BF, et al. A case series study of perinatal deaths at one referral center in  
632 rural post-conflict Liberia. *Matern Child Health J* 2014;18(1):45-51. doi: 10.1007/s10995-013-  
633 1232-y
- 634 14. Smith JM, Baawo SD, Subah M, et al. Advance distribution of misoprostol for prevention of  
635 postpartum hemorrhage (PPH) at home births in two districts of Liberia. *BMC Pregnancy*  
636 *Childbirth* 2014;14:189. doi: 10.1186/1471-2393-14-189
- 637 15. Solanke BL, Amoo EO, Idowu AE. Improving postnatal checkups for mothers in West Africa: A  
638 multilevel analysis. *Women & Health* 2017:1-25.
- 639 16. Lori JR, Munro ML, Moore JE, et al. Lessons learned in Liberia: preliminary examination of the  
640 psychometric properties of trust and teamwork among maternal healthcare workers. *BMC*  
641 *health services research* 2013;13(1):134.
- 642 17. Lori JR, Munro-Kramer ML, Shifman J, et al. Patient satisfaction with maternity waiting homes in  
643 Liberia: a case study during the Ebola outbreak. *Journal of Midwifery & Women's Health*  
644 2017;62(2):163-71.



- 1  
2  
3 645 18. Lori JR, Starke AE. A critical analysis of maternal morbidity and mortality in Liberia, West Africa.  
4 646 *Midwifery* 2012;28(1):67-72.
- 5 647 19. Lori JR, Wadsworth AC, Munro ML, et al. Promoting access: The use of maternity waiting homes to  
6 648 achieve safe motherhood. *Midwifery* 2013;29(10):1095-102.
- 7 649 20. Cooper CM, Fields R, Mazzeo CI, et al. Successful proof of concept of family planning and  
8 650 immunization integration in Liberia. *Glob Health Sci Pract* 2015;3(1):71-84. doi: 10.9745/GHSP-D-  
9 651 14-00156
- 10 652 21. Guyon A, Bock A, Buback L, et al. Mobile-Based Nutrition and Child Health Monitoring to Inform  
11 653 Program Development: An Experience From Liberia. *Global Health: Science and Practice*  
12 654 2016;4(4):661-70. doi: 10.9745/GHSP-D-16-00189
- 13 655 22. Munro ML, Lori JR, Boyd CJ, et al. Knowledge and Skill Retention of a Mobile Phone Data Collection  
14 656 Protocol in Rural Liberia. *Journal of Midwifery & Women's Health* 2014;59(2):176-83. doi:  
15 657 10.1111/jmwh.12155
- 16 658 23. Luckow PW, Kenny A, White E, et al. Implementation research on community health workers'  
17 659 provision of maternal and child health services in rural Liberia. *Bulletin of the World Health*  
18 660 *Organization* 2017;95(2):113-20. doi: 10.2471/BLT.16.175513
- 19 661 24. Lori JR, Majszak CM, Martyn KK. Home-Based Life-Saving Skills in Liberia: Acquisition and Retention of  
20 662 Skills and Knowledge. *Journal of Midwifery and Women's Health* 2010;55(4):370-77. doi:  
21 663 10.1016/j.jmwh.2009.09.016
- 22 664 25. Lori J. Maternity waiting homes and traditional midwives in rural Liberia. *International Journal of*  
23 665 *Gynecology and Obstetrics* 2013;123:114-18.
- 24 666 26. Shoman H, Karafillakis E, Rawaf S. The link between the West African Ebola outbreak and health  
25 667 systems in Guinea, Liberia and Sierra Leone: a systematic review. *GLOBALIZATION AND HEALTH*  
26 668 2017;13(1) doi: 10.1186/s12992-016-0224-2
- 27 669 27. Iyengar P, Kerber K, Howe CJ, et al. Services for mothers and newborns during the ebola outbreak in  
28 670 Liberia: the need for improvement in emergencies. *PLoS currents* 2015;7 doi:  
29 671 10.1371/currents.outbreaks.4ba318308719ac86fbef91f8e56cb66f
- 30 672 28. Ly J, Sathanathan V, Griffiths T, et al. Facility-Based Delivery during the Ebola Virus Disease Epidemic  
31 673 in Rural Liberia: Analysis from a Cross-Sectional, Population-Based Household Survey. *PLoS*  
32 674 *medicine* 2016;13(8):e1002096. doi: 10.1371/journal.pmed.1002096
- 33 675 29. Fallah MP, Skrip LA, Dahn BT, et al. Pregnancy outcomes in Liberian women who conceived after  
34 676 recovery from Ebola virus disease. *The Lancet Global health* 2016;4(10):e678-e79. doi:  
35 677 10.1016/S2214-109X(16)30147-4
- 36 678 30. Mbonye AK, Sentongo M, Mukasa GK, et al. Newborn survival in Uganda: a decade of change and  
37 679 future implications. *Health Policy Plan* 2012;27 Suppl 3:iii104-17. doi: 10.1093/heapol/czs045
- 38 680 31. Kuruvilla S, Schweitzer J, Bishai D, et al. Success factors for reducing maternal and child mortality. *Bull*  
39 681 *World Health Organ* 2014;92(7):533-44B. doi: 10.2471/BLT.14.138131
- 40 682 32. Afnan-Holmes H, Magoma M, John T, et al. Tanzania's Countdown to 2015: an analysis of two  
41 683 decades of progress and gaps for reproductive, maternal, newborn, and child health, to inform  
42 684 priorities for post-2015. *The Lancet Global Health* 2015;3(7):e396-e409.
- 43 685 33. Amouzou A, Habi O, Bensaïd K, et al. Reduction in child mortality in Niger: a Countdown to 2015  
44 686 country case study. *The Lancet* 2012;380(9848):1169-78.
- 45 687 34. Zimba E, Kinney MV, Kachale F, et al. Newborn survival in Malawi: a decade of change and future  
46 688 implications. *Health policy and planning* 2012;27(suppl\_3):iii88-iii103.
- 47 689 35. Kipp AM, Blevins M, Haley CA, et al. Factors associated with declining under-five mortality rates from  
48 690 2000 to 2013: an ecological analysis of 46 African countries. *BMJ open* 2016;6(1):e007675. doi:  
49 691 10.1136/bmjopen-2015-007675

- 1  
2  
3 692 36. Brault MA, Ngure K, Haley CA, et al. The Introduction of New Policies and Strategies to Reduce  
4 693 Inequities and Improve Child Health in Kenya: a country case study on progress in child survival,  
5 694 2000-2013. *PloS one* in press  
6 695 37. Haley CA, Vermund SH, Moyo P, et al. Impact of a critical health workforce shortage on child health in  
7 696 Zimbabwe: a country case study on progress in child survival, 2000–2013. *Health policy and*  
8 697 *planning* 2017:czw162.  
9 698 38. Kipp AM, Maimbolwa M, Brault MA, et al. Improving access to child health services at the community  
10 699 level in Zambia: a country case study on progress in child survival, 2000–2013. *Health policy and*  
11 700 *planning* 2016:czw141.  
12 701 39. World Bank. The World Bank Data Catalog [Available from: <http://datacatalog.worldbank.org/>  
13 702 accessed August 2015.  
14 703 40. Liberia Institute of Statistics and Geo-Information Services (LISGIS), Ministry of Health and Social  
15 704 Welfare [Liberia], National AIDS Control Program [Liberia], et al. Liberia Demographic and Health  
16 705 Survey 2013. Monrovia, Liberia: LISGIS and ICF International, 2014.  
17 706 41. Liberia Institute of Statistics and Geo-Information Services (LISGIS) [Liberia], Ministry of Health and  
18 707 Social Welfare [Liberia], National AIDS Control Program [Liberia], et al. Liberia Demographic and  
19 708 Health Survey 2007. Monrovia, Liberia: Liberia Institute of Statistics and Geo-Information  
20 709 Services (LISGIS) and Macro International Inc, 2008.  
21 710 42. WHO. Child Survival: A Strategy for the African Region. Brazzaville: World Health Organization,  
22 711 Regional Office for Africa, 2006.  
23 712 43. Organization WH. Everybody's business--strengthening health systems to improve health outcomes:  
24 713 WHO's framework for action. 2007  
25 714 44. Ban K. Global Strategy for Women's and Children's Health. New York: United Nations. 2010  
26 715 45. Countdown to 2015 Decade Report (2000-2010): Taking stock of maternal, newborn, and child  
27 716 survival. *WHO and UNICEF* 2010  
28 717 46. WHO, PMNCH. A global review of the key interventions related to reproductive, maternal, newborn  
29 718 and child health (RMNCH). *WHO and The Partnership for Maternal Newborn & Child Health*  
30 719 *(PMNCH), Geneva, Switzerland* 2011  
31 720 47. Organization WH. Keeping Promises, Measuring Results: Commission on Information and  
32 721 Accountability for Women's and... Children's Health: World Health Organization 2012.  
33 722 48. Chieh-Johnson D, Cross A, Way A, et al. Liberia Demographic and Health Survey 1986. Columbia,  
34 723 Maryland, USA: Monrovia, Liberia and Columbia, Maryland: Bureau of Statistics [Liberia],  
35 724 Ministry of Planning and Economic Affairs, and Institute for Resource  
36 725 Development/Westinghouse, 1988.  
37 726 49. Collins D. Pretesting Survey Instruments: An Overview of Cognitive Methods. *Quality of Life Research*  
38 727 2003;12(3):229-38. doi: 10.1023/A:1023254226592  
39 728 50. Murh T. User's Manual for Atlas. ti 6.0. *Berlin: Atlas ti* 2004  
40 729 51. Nastasi BK, Schensul SL. Contributions of qualitative research to the validity of intervention research.  
41 730 *Journal of School Psychology* 2005;43(3):177-95.  
42 731 52. Schensul SL. Using ETHNOGRAPH to build a survey instrument. *Field Methods* 1993;5(2)  
43 732 53. Liberia Ministry of Health and Social Welfare (MoHSW). The National Health Policy and Plan, 2007-  
44 733 2011. Monrovia, Liberia: Ministry of Health and Social Welfare, 2007.  
45 734 54. Liberia Ministry of Health and Social Welfare (MoHSW). National Health and Social Welfare Policy  
46 735 and Plan 2011-2021. Monrovia, Liberia: Ministry of Health and Social Welfare 2011.  
47 736 55. Liberia Ministry of Health and Social Welfare (MoHSW). Revised National Community Health Services  
48 737 Policy. Monrovia, Liberia: Ministry of Health and Social Welfare 2011.

- 1  
2  
3 738 56. Howard N, Woodward A, Patel D, et al. Perspectives on reproductive healthcare delivered through a  
4 739 basic package of health services in Afghanistan: a qualitative study. *BMC Health Serv Res*  
5 740 2014;14:359. doi: 10.1186/1472-6963-14-359  
6 741 57. Roberts B, Guy S, Sondorp E, et al. A basic package of health services for post-conflict countries:  
7 742 implications for sexual and reproductive health services. *Reprod Health Matters* 2008;16(31):57-  
8 743 64. doi: 10.1016/S0968-8080(08)31347-0  
9 744 58. Hrabac B, Ljubic B, Bagaric I. Basic package of health entitlements and solidarity in the Federation of  
10 745 Bosnia and Herzegovina. *Croatian medical journal* 2000;41(3):287-93.  
11 746 59. Newbrander W, Ickx P, Feroz F, et al. Afghanistan's basic package of health services: its development  
12 747 and effects on rebuilding the health system. *Global public health* 2014;9(sup1):S6-S28.  
13 748 60. Newbrander W, Waldman R, Shepherd-Banigan M. Rebuilding and strengthening health systems and  
14 749 providing basic health services in fragile states. *Disasters* 2011;35(4):639-60.  
15 750 61. Liberia Ministry of Health and Social Welfare (MoHSW) Essential Package of Health Services for  
16 751 Primary Care: The Community Health System. Monrovia, Liberia: Ministry of Health and Social  
17 752 Welfare, 2011.  
18 753 62. Liberia Ministry of Health and Social Welfare (MoHSW). Essential Package of Health Services for  
19 754 Secondary & Tertiary Care: The District, County & National Health Systems. Monrovia, Liberia:  
20 755 Ministry of Health and Social Welfare, 2011.  
21 756 63. Petit D, Sondorp E, Mayhew S, et al. Implementing a Basic Package of Health Services in post-conflict  
22 757 Liberia: Perceptions of key stakeholders. *Social Science and Medicine* 2013;78(1):42-49. doi:  
23 758 10.1016/j.socscimed.2012.11.026  
24 759 64. Leather A, Ismail EA, Ali R, et al. Working together to rebuild health care in post-conflict Somaliland.  
25 760 *Lancet* 2006;368(9541):1119-25. doi: 10.1016/S0140-6736(06)69047-8  
26 761 65. Morikawa MJ, Schneider S, Becker S, et al. Primary care in post-conflict rural northern Afghanistan.  
27 762 *Public Health* 2011;125(1):55-9. doi: 10.1016/j.puhe.2010.08.021  
28 763 66. Nagai M, Abraham S, Okamoto M, et al. Reconstruction of health service systems in the post-conflict  
29 764 Northern Province in Sri Lanka. *Health Policy* 2007;83(1):84-93. doi:  
30 765 10.1016/j.healthpol.2006.12.001  
31 766 67. Ho LS, Labrecque G, Batonon I, et al. Effects of a community scorecard on improving the local health  
32 767 system in Eastern Democratic Republic of Congo: qualitative evidence using the most significant  
33 768 change technique. *Conflict and Health* 2015;9(1):27. doi: 10.1186/s13031-015-0055-4  
34 769 68. Gopalan SS, Das A, Howard N. Maternal and neonatal service usage and determinants in fragile and  
35 770 conflict-affected situations: a systematic review of Asia and the Middle-East. *BMC WOMENS*  
36 771 *HEALTH* 2017;17(1) doi: 10.1186/s12905-017-0379-x  
37 772 69. Krause SK, Meyers JL, Friedlander E. Improving the availability of emergency obstetric care in conflict-  
38 773 affected settings. *Global Public Health* 2006;1(3):205-28. doi: 10.1080/17441690600679939  
39 774 70. Miyake S, Speakman EM, Currie S, et al. Community midwifery initiatives in fragile and conflict-  
40 775 affected countries: a scoping review of approaches from recruitment to retention. *Health policy*  
41 776 *and planning* 2017;32(1):21-33. doi: 10.1093/heapol/czw093  
42 777 71. Mullany LC, Lee TJ, Yone L, et al. Impact of community-based maternal health workers on coverage of  
43 778 essential maternal health interventions among internally displaced communities in Eastern  
44 779 Burma: the MOM project. *PLoS medicine* 2010;7(8):e1000317.  
45 780 72. Teela KC, Mullany LC, Lee CI, et al. Community-based delivery of maternal care in conflict-affected  
46 781 areas of eastern Burma: Perspectives from lay maternal health workers. *Social science &*  
47 782 *medicine* 2009;68(7):1332-40. doi: 10.1016/j.socscimed.2009.01.033  
48  
49  
50  
51  
52  
53  
54  
55  
56  
57  
58  
59  
60

- 1  
2  
3 783 73. Moucheraud C, Owen H, Singh NS, et al. Countdown to 2015 country case studies: what have we  
4 784 learned about processes and progress towards MDGs 4 and 5? *BMC public health*  
5 785 2016;16(S2):794. doi: 10.1186/s12889-016-3401-6  
6 786 74. Fernando D, de Silva NL, Ackers I, et al. Patient satisfaction and uptake of private-sector run malaria  
7 787 diagnosis clinics in a post-conflict district in Sri Lanka. *BMC Public Health* 2014;14:641. doi:  
8 788 10.1186/1471-2458-14-641  
9 789 75. Chi PC, Bulage P, Urdal H, et al. Barriers in the Delivery of Emergency Obstetric and Neonatal Care in  
10 790 Post-Conflict Africa: Qualitative Case Studies of Burundi and Northern Uganda: e0139120. *PLoS*  
11 791 *one* 2015;10(9) doi: 10.1371/journal.pone.0139120  
12 792 76. Iyengar P, Kerber K, Howe CJ, et al. Services for mothers and newborns during the ebola outbreak in  
13 793 liberia: the need for improvement in emergencies. *PLoS Curr* 2015;7 doi:  
14 794 10.1371/currents.outbreaks.4ba318308719ac86fbef91f8e56cb66f  
15 795 77. Balalian AA, Simonyan H, Hekimian K, et al. Adapting continuing medical education for post-conflict  
16 796 areas: assessment in Nagorno Karabagh - a qualitative study. *Human resources for health*  
17 797 2014;12:39. doi: 10.1186/1478-4491-12-39  
18 798 78. Chandrasekhar S, Gebreselassie T, Jayaraman A. Maternal Health Care Seeking Behavior in a Post-  
19 799 Conflict HIPC: The Case of Rwanda. *Popul Res Policy Rev* 2011;30(1):25-41. doi: 10.1007/s11113-  
20 800 010-9175-0  
21 801 79. Mwaka AD, Wabinga HR, Mayanja-Kizza H. Mind the gaps: a qualitative study of perceptions of  
22 802 healthcare professionals on challenges and proposed remedies for cervical cancer help-seeking  
23 803 in post conflict northern Uganda. *BMC Fam Pract* 2013;14:193. doi: 10.1186/1471-2296-14-193  
24 804 80. Roome E, Raven J, Martineau T. Human resource management in post-conflict health systems: review  
25 805 of research and knowledge gaps. *Confl Health* 2014;8:18. doi: 10.1186/1752-1505-8-18  
26 806 81. Bank W. World Bank Group Assistance to Low-Income Fragile and Conflict-Affected States: An  
27 807 Independent Evaluation: The World Bank 2015.  
28 808 82. Addison T, McGillivray M. Aid to conflict-affected countries: lessons for donors. *Conflict, Security &*  
29 809 *Development* 2004;4(3):347-67.  
30 810 83. Hill PS, Pavignani E, Michael M, et al. The "empty void" is a crowded space: health service provision  
31 811 at the margins of fragile and conflict affected states. *Confl Health* 2014;8:20. doi: 10.1186/1752-  
32 812 1505-8-20

813

## 814 Supporting Information

815 S1 Table. Liberia policy, strategy, and other national documents reviewed

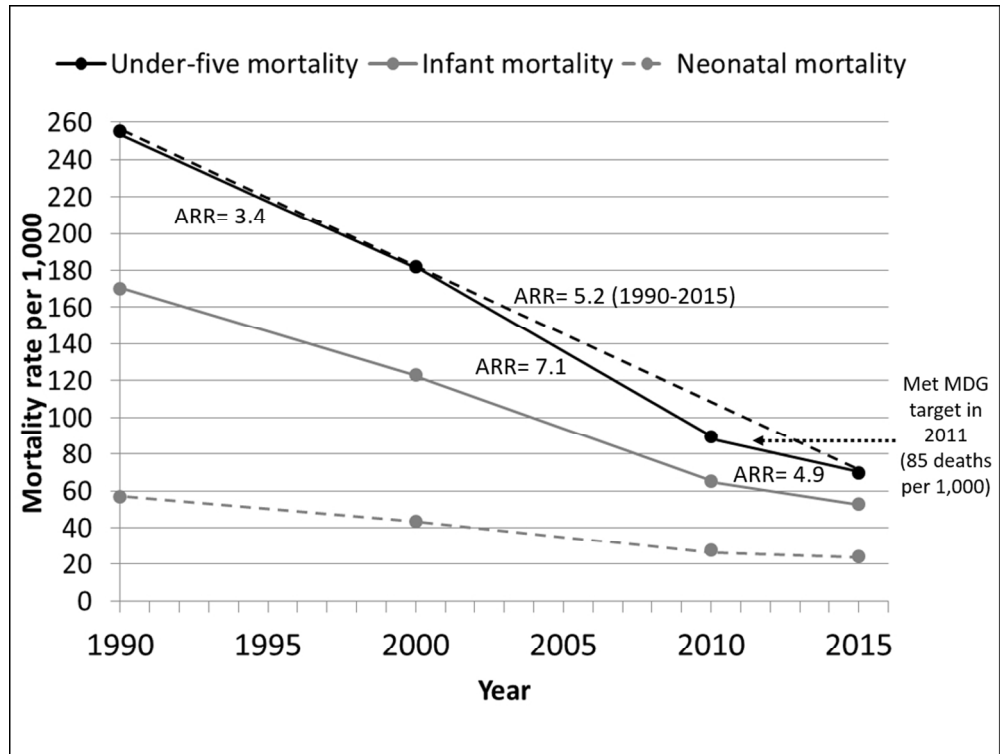

Figure 1: Under-five, infant, and neonatal mortality rates for Liberia in 1990, 2000, 2010, and 2015 (solid circles) with annual rates of reduction (ARR) for each period (solid and dashed lines).

197x148mm (150 x 150 DPI)

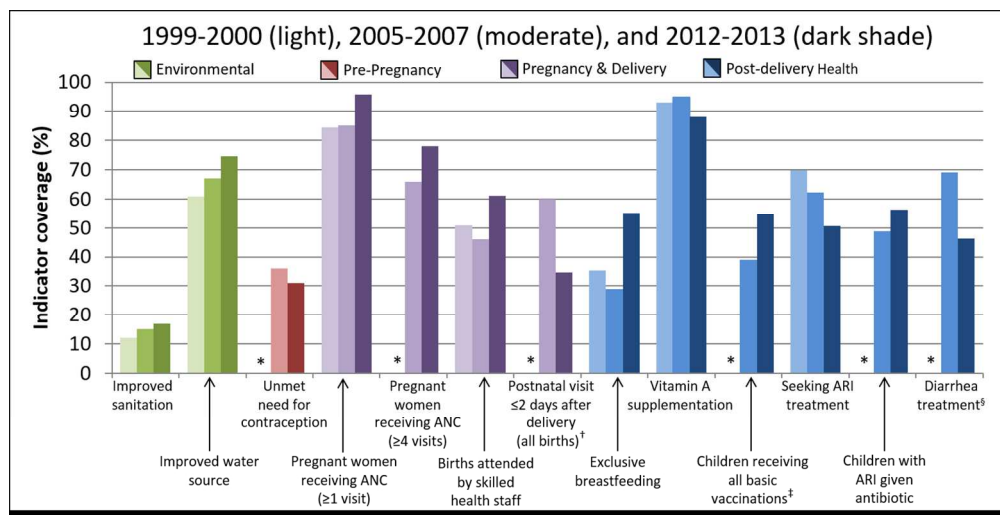

Figure 2: Changes in child survival indicator coverage in Liberia, 2000, 2007, and 2013\*.

254x129mm (150 x 150 DPI)

## Supplemental Table

Table S1. Liberia documents reviewed

| Document title (dates if not otherwise specified in title)                                                    |
|---------------------------------------------------------------------------------------------------------------|
| <b><i>Primary source documents* (Newest to oldest)</i></b>                                                    |
| Republic of Liberia Agenda for Transformation: Steps towards Liberia Rising 2030 (2012)                       |
| Accelerated Action Plan to Reduce Maternal and Neonatal Mortality, 2012-2016                                  |
| Situational Analysis of Newborn Health in Liberia (Parts A and B) (Drafts) (2012)                             |
| National Health and Social Welfare Policy and Plan, 2011-2021                                                 |
| Country Situational Analysis Report, 2011                                                                     |
| Road Map for Accelerating the Reduction of Maternal and Newborn Morbidity and Mortality in Liberia, 2011-2015 |
| Revised National Community Health Services Policy (2011)                                                      |
| Essential Package of Health Services: Primary Care, 2011-2021                                                 |
| Essential Package of Health Services: Secondary and Tertiary Care, 2011-2021                                  |
| National Strategy for Child Survival in Liberia, 2008-2011                                                    |
| <b><i>Other documents reviewed† (Newest to oldest)</i></b>                                                    |
| Micronutrient Powder Supplementation of Young Children Linked with IYCF community promotion, 2012-2015        |
| National Policy on Immunization, 2012                                                                         |
| National EPI Strategic Plan, 2011-2015                                                                        |
| National Sexual and Reproductive Health Policy (2010)                                                         |
| Integrated Guidelines of Prevention, Testing, Care and Treatment of HIV and AIDS in Liberia, 2010             |
| Report on the Assessment of Infant and Young Child Feeding Practices, Policies and Programmes in              |

1  
2  
3 Liberia 2009  
4

5 \*Primary documents extensively reviewed to obtain information on each content area identified in the abstraction  
6  
7 guide

8  
9 †Documents reviewed, but information on progress towards MDG#4 was sufficiently covered by the primary  
10  
11 documents  
12  
13  
14  
15  
16  
17  
18  
19  
20  
21  
22  
23  
24  
25  
26  
27  
28  
29  
30  
31  
32  
33  
34  
35  
36  
37  
38  
39  
40  
41  
42  
43  
44  
45  
46  
47  
48  
49  
50  
51  
52  
53  
54  
55  
56  
57  
58  
59  
60



# BMJ Open

## Factors influencing rapid progress in child health in post-conflict Liberia: a mixed methods country case study on progress in child survival, 2000-2013

|                                 |                                                                                                                                                                                                                                                                                                                                                                                                                                                                                                                                                                                                                                                                                                                                                                     |
|---------------------------------|---------------------------------------------------------------------------------------------------------------------------------------------------------------------------------------------------------------------------------------------------------------------------------------------------------------------------------------------------------------------------------------------------------------------------------------------------------------------------------------------------------------------------------------------------------------------------------------------------------------------------------------------------------------------------------------------------------------------------------------------------------------------|
| Journal:                        | <i>BMJ Open</i>                                                                                                                                                                                                                                                                                                                                                                                                                                                                                                                                                                                                                                                                                                                                                     |
| Manuscript ID                   | bmjopen-2018-021879.R1                                                                                                                                                                                                                                                                                                                                                                                                                                                                                                                                                                                                                                                                                                                                              |
| Article Type:                   | Research                                                                                                                                                                                                                                                                                                                                                                                                                                                                                                                                                                                                                                                                                                                                                            |
| Date Submitted by the Author:   | 11-Apr-2018                                                                                                                                                                                                                                                                                                                                                                                                                                                                                                                                                                                                                                                                                                                                                         |
| Complete List of Authors:       | Brault, Marie; University of Connecticut System, Anthropology<br>Kennedy, Stephen; University of Liberia, University of Liberia-Pacific<br>Institute for Research & Evaluation (UL-PIRE) Africa Center<br>Haley, Connie; Vanderbilt Institute for Global Health, ; Vanderbilt<br>University Medical Center, Dept. of Medicine, Division of Epidemiology<br>Clarke, Adolphus; Liberia Ministry of Health and Social Welfare<br>Duworko, Musu; World Health Organization Country Office for Liberia<br>Habimana, Phaniel; World Health Organization/Regional Office for Africa,<br>Vermund, Sten; Vanderbilt University, Institute for Global Health<br>Kipp, Aaron; Vanderbilt University,<br>Mwinga, Kasonde; World Health Organization/Regional Office for Africa, |
| <b>Primary Subject Heading</b>: | Global health                                                                                                                                                                                                                                                                                                                                                                                                                                                                                                                                                                                                                                                                                                                                                       |
| Secondary Subject Heading:      | Paediatrics                                                                                                                                                                                                                                                                                                                                                                                                                                                                                                                                                                                                                                                                                                                                                         |
| Keywords:                       | PUBLIC HEALTH, QUALITATIVE RESEARCH, Community child health < PAEDIATRICS, International health services < HEALTH SERVICES ADMINISTRATION & MANAGEMENT                                                                                                                                                                                                                                                                                                                                                                                                                                                                                                                                                                                                              |
|                                 |                                                                                                                                                                                                                                                                                                                                                                                                                                                                                                                                                                                                                                                                                                                                                                     |

SCHOLARONE™  
Manuscripts

1  
2  
3 1 Factors influencing rapid progress in child health in post-conflict Liberia: a mixed methods country case  
4 2 study on progress in child survival, 2000-2013  
5  
6 3

7  
8 4 Marie A. Brault<sup>1\*</sup>, Stephen B. Kennedy<sup>2</sup>, Connie A. Haley<sup>3,4</sup>, Adolphus T. Clarke<sup>5</sup>, Musu C. Duworko<sup>6</sup>,  
9 5 Phaniel Habimana<sup>7</sup>, Sten H. Vermund<sup>3,8\*</sup>, Aaron M. Kipp<sup>3,4\*\*</sup>, Kasonde Mwinga<sup>7</sup>  
10  
11 6  
12 7  
13

14 8 <sup>1</sup>Department of Anthropology, University of Connecticut, Storrs, CT USA  
15

16 9 \*Now at the Yale School of Public Health, New Haven, CT, USA  
17

18 10 <sup>2</sup>University of Liberia-Pacific Institute for Research & Evaluation (UL-PIRE) Africa Center, University of  
19 11 Liberia, Monrovia, Liberia  
20

21 12 <sup>3</sup>Vanderbilt Institute for Global Health, Vanderbilt University, Nashville, TN, USA <sup>4</sup>Department of  
22 13 Medicine and, Vanderbilt University Medical Center, Nashville, TN, USA  
23

24 14 <sup>5</sup>Liberia Ministry of Health and Social Welfare, Monrovia, Liberia  
25

26 15 <sup>6</sup>World Health Organization/Liberia Country office, Monrovia, Liberia  
27

28 16 <sup>7</sup>World Health Organization/Regional Office for Africa, Brazzaville, Congo  
29

30 17 <sup>8</sup>Department of Pediatrics, Vanderbilt University Medical Center, Nashville, TN, USA  
31  
32 18

33  
34 19 Corresponding author: \*\*Aaron M. Kipp

35 20 Vanderbilt Institute for Medicine and Public Health

36 21 2525 West End. Ave., ste 614

37 22 Nashville, TN 37203

38 23 Email: [aaron.kipp@Vanderbilt.Edu](mailto:aaron.kipp@Vanderbilt.Edu)  
39  
40  
41 24

42  
43 24 Word Count: 6209  
44  
45 25  
46  
47 26  
48  
49  
50 27  
51  
52  
53  
54 28  
55  
56  
57  
58  
59  
60

1  
2  
3 **29 ABSTRACT**  
4  
5

6 30 Objectives: Only 12 countries in the World Health Organization's African region met Millennium  
7  
8 31 Development Goal #4 (MDG#4) to reduce under-five mortality by two-thirds by 2015. Given the  
9  
10 32 variability across the African region, a four-country mixed methods study was undertaken to examine  
11  
12 33 barriers and facilitators of child survival prior to 2015. Liberia was selected for an in-depth case study  
13  
14 34 due to its success in reducing under-five mortality by 73%, and thus successfully meeting MDG#4.  
15  
16 35 Liberia's success was particularly notable given the civil war that ended in 2003. We examined some  
17  
18 36 factors contributing to their reductions in under-five mortality.  
19  
20  
21

22 37 Design: A case study mixed methods approach drawing on data from quantitative indicators, national  
23  
24 38 documents, and qualitative interviews was used to describe factors that enabled Liberia to rebuild their  
25  
26 39 maternal, neonatal and child health (MNCH) programs and reduce under-five mortality following the  
27  
28 40 country's civil war.  
29  
30  
31

32 41 Setting: The interviews were conducted in Monrovia (Montserrado County) and the areas in and around  
33  
34 42 Gbarnga, Liberia (Bong County, North Central region).  
35  
36

37 43 Participants: Key informant interviews were conducted with Ministry of Health officials, donor  
38  
39 44 organizations, community-based organizations involved in MNCH, and health care workers. Focus group  
40  
41 45 discussions were conducted with women who have experience accessing MNCH services.  
42  
43

44 46 Results: Three prominent factors contributed to the reduction in under-five mortality: national  
45  
46 47 prioritization of MNCH after the civil war; implementation of integrated packages of services that  
47  
48 48 expanded access to key interventions and promoted inter-sectoral collaborations; and use of outreach  
49  
50 49 campaigns, community health workers and trained traditional midwives to expand access to care and  
51  
52 50 improve referrals.  
53  
54  
55

1  
2  
3 51 Conclusions: Although Liberia experiences continued challenges related to limited resources, Liberia's  
4  
5 52 effective strategies and rapid progress may provide insights for reducing under-five mortality in other  
6  
7 53 post-conflict settings.

9  
10 54 Keywords: Public health, Qualitative research, Community child health < Paediatrics, International health  
11  
12 55 services < Health services administration & management

13  
14  
15 56 Strengths and limitations of this study

- 16  
17  
18 57 • Presents qualitative and quantitative data on implementation of maternal, neonatal and child  
19  
20 58 health (MNCH) interventions in Liberia, which has been understudied in Liberia.
- 21  
22  
23 59 • Most studies exploring progress in child survival only present qualitative data from key  
24  
25 60 informants working within the healthcare system, but this paper also provides data from women  
26  
27 61 attempting to access services for themselves and their children in both urban and rural contexts.
- 28  
29 62 • For the review of national MNCH documents, policies and strategies were not issued until after  
30  
31 63 2007 due to the civil war. While these documents contained retrospective assessments of the  
32  
33 64 preceding period, assessments of the impact of more recent policies or strategies were not  
34  
35 65 available.
- 36  
37  
38 66 • The qualitative data were limited to a non-random sample of participants and conducted in two  
39  
40 67 counties (one urban, one rural). It is possible that the changes in under-five mortality in these  
41  
42 68 areas do not reflect changes at the national level and that the views and experiences of some  
43  
44 69 participants do not reflect those from other areas of Liberia.
- 45  
46  
47  
48  
49  
50  
51  
52  
53  
54  
55  
56  
57  
58  
59  
60

## 72 INTRODUCTION

73 Under-five mortality has declined in sub-Saharan Africa from an estimated 180 deaths per 1,000  
74 live births in 1990 to 83 deaths per 1,000 in 2015 <sup>1</sup>, yet this was not sufficient for this region to meet  
75 Millennium Development Goal (MDG) #4 of reducing under-five mortality by two-thirds between 1990  
76 and 2015 <sup>2</sup>. Nevertheless, as of 2015, 12 African countries had met their MDG#4 goal <sup>1</sup>. There is thus  
77 much interest in understanding why some countries met MDG#4 while others did not. Liberia witnessed  
78 a dramatic reduction in under-five mortality from 255 to 70 deaths per 1,000 live births between 1990  
79 and 2015 (Fig 1) <sup>1</sup>. This 73% reduction in mortality rates means that Liberia effectively met MDG#4 ahead  
80 of schedule. Infant mortality saw a similar 69% reduction over the period, while neonatal mortality  
81 declined less rapidly.

82 Figure 1 here.

83 Liberia's accomplishments are especially notable given the 14 years of civil war, ending in 2003,  
84 that destroyed most of the national infrastructure, eroded the country's social fabric, and cost at least  
85 200,000 lives. Many health facilities were destroyed, skilled personnel were lost, and essential medicines  
86 and supplies were scarce <sup>3</sup>. Liberia emerged from this crisis with extremely limited health infrastructure  
87 and poor maternal, neonatal and child health (MNCH) services. As a result of strong commitment and  
88 collaboration among the government and organizations from across civil society, the private sector and  
89 the general public, Liberia made notable gains towards re-establishing peace and security, revitalizing  
90 the economy, strengthening governance, and rebuilding health infrastructure, including MNCH services  
91 <sup>3</sup>. Bornemisza, et al. <sup>4</sup> describe how the post-conflict period provides a unique opportunity for countries  
92 to address problems with their health care systems, as it is easier to create widespread change during a  
93 rebuilding period. Thus, identifying the specific factors that enabled Liberia to rapidly improve MNCH  
94 services after the civil crisis can inform other countries coming out of conflict or looking to make large-

1  
2  
3 95 scale changes. In addition, Liberia could use information from its post-conflict successes to inform and  
4  
5 96 contribute to its own rebuilding efforts after the 2014-2015 Ebola virus epidemic.  
6  
7

8 97 A growing body of literature on MNCH in Liberia explores the country's efforts to implement  
9  
10 98 MNCH interventions and expand access to care. Little research was published during the civil crisis and  
11  
12 99 MNCH studies since have been primarily localized or quantitative<sup>5-15</sup>, focusing on access and utilization  
13  
14  
15 100 of specific MNCH interventions. Much of the qualitative or mixed-methods literature from Liberia to-  
16  
17 101 date has focused on maternal and reproductive health<sup>16-19</sup>. Only one of the mixed-methods studies from  
18  
19 102 Liberia evaluated integration and delivery of MNCH services<sup>20</sup>. A few studies have reported on positive  
20  
21 103 outcomes of specific interventions related to mobile data collection and monitoring<sup>21 22</sup>, and training of  
22  
23 104 community health workers<sup>23</sup> and midwives to deliver MNCH interventions at the community level<sup>24 25</sup>.  
24  
25  
26 105 There have also been recent studies examining service usage, links between aspects of the healthcare  
27  
28 106 system and the West African Ebola outbreak<sup>26-29</sup>. There thus remains much to be understood about  
29  
30 107 implementation of MNCH interventions and services and progress in reducing under-five mortality.  
31  
32  
33 108 While case studies from other countries making significant gains in child survival such as Niger, Uganda,  
34  
35 109 Malawi, Ethiopia, Rwanda, and Tanzania<sup>30-34</sup> have evaluated system-level factors contributing to their  
36  
37 110 success, only Tanzania included qualitative information from individuals attempting to access services for  
38  
39 111 themselves or their children.  
40  
41

42 112 To contribute to the growing literature on how progress in reducing under-five mortality can be  
43  
44 113 achieved in resource-limited countries, we conducted an in-depth case study from Liberia as part of a  
45  
46  
47 114 larger study seeking to understand the factors influencing progress in child survival in the Africa region  
48  
49 115 among countries that were on-track (Liberia and Zambia) and not on-track (Kenya and Zimbabwe) to  
50  
51 116 meet MDG#4.<sup>35-38</sup> The period of interest was from the beginning of the MDG movement in 2000 through  
52  
53  
54 117 2013 when the study was initiated. Our primary objective in the Liberia case study was to examine in-  
55  
56  
57  
58  
59  
60

1  
2  
3 118 depth the specific factors influencing child survival and attainment of MDG#4 in a post-conflict setting in  
4  
5 119 sub-Saharan Africa. By evaluating national policies and strategies, qualitative data, and quantitative  
6  
7 120 indicator data we identified several overarching factors consistently reported to have improved access  
8  
9  
10 121 and utilization of care for children under-five, and reduced under-five mortality in Liberia.  
11

## 12 122 **METHODS**

13  
14  
15 123 Our case study utilized country-level indicator data for the years closest to 2000, 2005, and 2013  
16  
17 124 (details below), a review of national policies and strategies issued between 2007 and 2013, following the  
18  
19 125 civil conflict, and key informant interviews and focus groups with community women conducted in 2013.  
20  
21  
22

### 23 126 **MNCH indicator data**

24  
25  
26 127 Prior to 2000, country-level data for core MNCH indicators monitored by Countdown to 2015  
27  
28 128 were not reliably available from many African countries, including Liberia. Most of Liberia's indicator  
29  
30 129 data reported here were obtained from the World Bank Data Catalogue<sup>39</sup>, a repository of national,  
31  
32 130 regional, and global indicator data compiled from officially-recognized sources, including national  
33  
34 131 Demographic and Health Surveys (DHS) and other national surveys. Data for indicators not readily  
35  
36 132 available from the World Bank Data Catalogue were obtained from the 2007 and 2013 Liberian DHS<sup>40 41</sup>.  
37  
38  
39

40 133 We included indicator data most closely corresponding to the beginning and end of the study  
41  
42 134 period to enable description of trends during the period. No DHS was conducted in Liberia between 1986  
43  
44 135 and 2007 due to the civil war, resulting in substantial missing data for the time period around 2000. We  
45  
46 136 therefore also included 2007 DHS data to better visualize changes over time. Estimates were not always  
47  
48 137 available for exact years 2000, 2007, and 2013, but we used data that were available within a one to  
49  
50 138 two-year window (see Fig 2).  
51  
52  
53  
54  
55  
56  
57  
58  
59  
60

1  
2  
3 139 **Review of MNCH policies and strategies**  
4

5 140 An information abstraction guide based on relevant global strategies related to child survival<sup>42-47</sup>  
6  
7 141 was developed to guide the document procurement and review process according to the following eight  
8  
9 142 content areas: 1) Health care system (including leadership, structure, human resources for health, access  
10  
11 & utilization, monitoring & evaluation, and accountability), 2) National health strategies and policies (and  
12 143 regulations and laws, when applicable), 3) MNCH interventions, 4) Clinical standards and guidelines, 5)  
13  
14 144 Commodities and essential medicines, 6) Financial flows and resources, 7) Effective partnerships, and 8)  
15  
16 145 Other contextual factors (e.g., conflict, political environment, sanitation and hygiene, nutrition and food  
17  
18 146 security, education, and human rights). When reviewing documents for information pertaining to the  
19  
20 147 eight content areas, answers to the four overarching questions presented in Table 1 were sought from  
21  
22 148 each document.  
23  
24  
25  
26  
27

28 150 Policies and strategies pertaining to overall national health, MNCH, and those from other sectors  
29  
30 151 related to MNCH (e.g., education, water and sanitation, and agriculture and nutrition) were obtained  
31  
32 152 from the WHO African Region office, the WHO country focal points for Liberia, and Liberia's Ministry of  
33  
34 153 Health (MOH; formerly Ministry of Health and Social Welfare). These documents were reviewed and any  
35  
36 154 additional documents referenced and deemed important for the review (according to the abstraction  
37  
38  
39 155 guide) were obtained from WHO or MOH. The final list of reviewed documents can be found in Table S1.  
40  
41  
42  
43  
44  
45  
46  
47  
48  
49  
50  
51  
52  
53  
54  
55  
56  
57  
58  
59  
60



156 Table 1. Overarching questions to explore the eight content areas as related to child survival during the review of national health policies and  
 157 strategies, key informant interview, and focus groups with community women.

| <b>Overarching questions for review of national policies and strategies</b>                                                                                                                                                                                                                                                                                                                                                       | <b>Overarching questions explored with key informants</b>                                                                                                                                                                                                                                                                                                                                                                                    | <b>Overarching questions explored with community women</b>                                                                                                                                                                                                                                                              |
|-----------------------------------------------------------------------------------------------------------------------------------------------------------------------------------------------------------------------------------------------------------------------------------------------------------------------------------------------------------------------------------------------------------------------------------|----------------------------------------------------------------------------------------------------------------------------------------------------------------------------------------------------------------------------------------------------------------------------------------------------------------------------------------------------------------------------------------------------------------------------------------------|-------------------------------------------------------------------------------------------------------------------------------------------------------------------------------------------------------------------------------------------------------------------------------------------------------------------------|
| <p>What policies and strategies related to child health were in place between 2000 and 2013 (including changes during this period)?</p> <p>What challenges were stated as hindering progress towards MDG#4?</p> <p>What facilitators were stated as enabling progress towards MDG#4?</p> <p>What plans for change or improvements were either implemented after 2013 or were proposed as a measure to improve child survival?</p> | <p>What issues (positive or negative) exist related to program evaluation, access and utilization, coverage, impact, and sustainability, as appropriate?</p> <p>What is your knowledge of and experiences with MNCH across the <i>health care continuum</i> (prenatal care through age 5 years)?</p> <p>What is your knowledge of and experiences with MNCH across the <i>health system continuum</i> (community to tertiary hospitals)?</p> | <p>What are the barriers and facilitators to accessing and utilizing MNCH services, including cultural and community factors?</p> <p>What have been your experiences with MNCH across the <i>health care continuum</i>?</p> <p>What have been your experiences with MNCH across the <i>health system continuum</i>?</p> |

1  
2  
3 158 Each document was reviewed by two authors (MAB, CAH) and information was recorded and  
4  
5 159 summarized according to the abstraction guide. To avoid biased interpretation of the information  
6  
7 160 documented, the abstracted information was reported as it was stated in the original source, and efforts  
8  
9  
10 161 were made not to overstate or minimize the original information or add commentary not contained in  
11  
12 162 the source.

### 15 163 **Qualitative study procedures**

#### 18 164 Study location and participants

20 165 Because major differences in MNCH often exist between urban and rural areas, participants for  
21  
22 166 the qualitative study were included from both urban and rural areas. The design of the parent study  
23  
24 167 (consisting of four country case-studies) used country DHS to compare region-specific under-five  
25  
26 168 mortality rates and declines in mortality over the study period. Urban and rural sites for the qualitative  
27  
28 169 study were to be selected from the region or county whose annual rate of reduction in under-five  
29  
30 170 mortality most closely matched that of the nation as a whole. In the case of Liberia, the 1986 DHS only  
31  
32 171 reported mortality for three counties, while the 2007 DHS reported mortality rates for Monrovia and six  
33  
34 172 regions comprised of three counties each<sup>41 48</sup>. As such, specific locations representative of Liberia's  
35  
36 173 progress as a nation could not be conclusively identified. Following discussions with the in-country  
37  
38 174 Primary Investigator (SBK) Monrovia (Montserrado County) was selected as the urban location with  
39  
40 175 focus groups conducted in the Paynesville and New Kru Town areas, and the areas in and around  
41  
42 176 Gbarnga (Bong County, North Central region) were chosen as the rural location with focus groups  
43  
44 177 conducted in Gbarnga and Totota. While we cannot ensure these locations experienced declines in  
45  
46 178 under-five mortality similar to Liberia as a whole, the other three country case studies were also largely  
47  
48 179 conducted in the capital (urban site) and a nearby rural region<sup>35 36 38</sup>. Bong County was selected because  
49  
50  
51  
52  
53  
54  
55  
56  
57  
58  
59  
60

1  
2  
3 180 it was reasonably accessible for conducting the study in a timely manner and was not markedly different  
4  
5 181 from other areas of the country in terms of demographics and health infrastructure.

6  
7 182 Data were obtained from semi-structured, key informant interviews with Ministry of Health  
8  
9 183 (MOH) officials (N=11 individuals interviewed), donor organizations (N=8), community-based  
10  
11 184 organizations (CBO) involved in MNCH (N=14), and health care workers (HCW) (N=14). Data were also  
12  
13 185 obtained from four focus group discussions, two in Monrovia (N=16 total participants) and two in Bong  
14  
15 186 County (N=21), with women who have experience accessing MNCH services. Interviews and focus groups  
16  
17 187 were conducted between October 30 and December 19, 2013.

18  
19  
20  
21  
22 188 Eligibility criteria and identification of study participants

23  
24  
25 189 All participants, whether key informants or focus group women, were eligible for the study if  
26  
27 190 they met the following criteria: 1) being 18 years of age or older, 2) having adequate knowledge or  
28  
29 191 experiences related to childhood survival specified for each participant group below, 3) speaking English  
30  
31 192 or Liberian English, and 4) being able to provide written informed consent. Specific inclusion criteria for  
32  
33 193 each key informant group included the following: national or provincial-level officials working in  
34  
35 194 government-level health care system administration, policy-making, program development, leadership,  
36  
37 195 or any aspect of MNCH (MOH officials); directors, managers, or other leaders of entities providing  
38  
39 196 financial or other aid for MNCH services, or international or national organizations focusing on MNCH or  
40  
41 197 having MNCH as one component of their mission (Donor organizations); directors, leaders, or managers  
42  
43 198 working for a CBO involved in or providing referrals to MNCH services; and professionally trained  
44  
45 199 physicians, nurses, clinical officers, or other health-related staff working in a health facility providing  
46  
47 200 MNCH care (HCPs).

48  
49  
50  
51  
52 201 Similar numbers of participants from each key informant group were enrolled, and a range of  
53  
54 202 ages, work experiences, and positions/roles within each group was sought using department registers

1  
2  
3 203 when available. Additionally, efforts were made to balance the number of urban and rural participants  
4  
5 204 among the HCWs and CBO workers. Lists of potential key informants from each group were developed  
6  
7 205 by the in-country research team with assistance, as needed, from the WHO National Professional Officer  
8  
9 206 for Family Health and the MOH Deputy Programme Manager for the Expanded Program on  
10  
11 207 Immunizations. A letter signed by an official from the MOH was sent to each potential key informant  
12  
13 208 participant informing them of the purpose of the study, risks and benefits of participation, and  
14  
15 209 describing the interview process. These were followed-up with a phone call or email to those interested.  
16  
17 210 The final number of key informant interviews conducted was arrived at through a combination of  
18  
19 211 approaches. Due to study logistics, we set a minimum number of six interviews to be conducted with  
20  
21 212 both MOH and donor organization representatives and a minimum of twelve interviews (have urban,  
22  
23 213 half rural) to be conducted with both HCWs and CBO representatives. In an effort to achieve saturation,  
24  
25 214 we prioritized diversity in the types of key informants we reached (Table S2). The in-country PI and  
26  
27 215 research assistants monitored data collection and saturation.  
28  
29  
30  
31  
32

33 216  
34 217  
35 218 Women were recruited to participate in focus groups using informational flyers or  
36  
37 219 advertisements posted in different health centers and surrounding communities. As with the key  
38  
39 220 informants, a balance was sought in the level of education and participants with live and deceased  
40  
41 221 children, as well as a diversity of experiences and opinions regarding access and utilization of MNCH  
42  
43 222 services. The number of focus groups was determined at the outset of the study, and constrained by  
44  
45 223 study logistics. Written informed consent was obtained from all enrolled participants. Community  
46  
47 224 women (Table S3) were provided a small monetary compensation for their participation.  
48  
49  
50

51 225  
52 226 Interview and discussion guides  
53  
54  
55

1  
2  
3 227 Interview guides for key informants and discussion guides for focus groups with community  
4  
5 228 women were developed, pilot tested through cognitive interviewing<sup>49</sup>, and revised as needed. The  
6  
7 229 guides focused on experiences with MNCH services and barriers to and facilitators for improving child  
8  
9 230 survival (Table 1), pertaining to the eight content areas evaluated during the review of national health  
10  
11 231 policies and strategies. Not all content areas were appropriate for each key informant group, but each  
12  
13 232 topic was asked of at least two of the four groups. The content areas and overarching questions were  
14  
15 233 developed to provide structure across the four country case studies of the parent study. However, they  
16  
17 234 were intentionally broad to provide sufficient flexibility for participants within and across countries to  
18  
19 235 discuss the issues most relevant to them. Focus group discussions with community women focused only  
20  
21 236 on the health care system, MNCH interventions, medicines, and contextual factors content areas. While  
22  
23 237 participants could discuss the entire period from 2000 forward, most participants recalled more recent  
24  
25 238 information and experiences.

#### 29 30 239 Data collection

31  
32  
33 240 Prior to conducting interviews and focus group discussions, participants completed a brief survey  
34  
35 241 to obtain basic demographic information, MNCH-related work experience (key informants only),  
36  
37 242 socioeconomic information (focus group women only), and/or information on births and under-five  
38  
39 243 deaths in the household (focus group women only).

40  
41  
42  
43 244 Key informant interviews were conducted in English by one research assistant using the  
44  
45 245 appropriate interview guide and were audio recorded. Key informants were encouraged to provide their  
46  
47 246 perspectives openly and discuss a range of barriers and facilitators to child survival. Interviews typically  
48  
49 247 lasted 60-90 minutes. The focus group discussions were conducted in Liberian English and were audio  
50  
51 248 recorded. Two Liberian research assistants (one male and one female) were present at each focus group  
52  
53 249 to facilitate discussion and note-taking. Focus group participants were encouraged to provide their

250 opinions openly, and research assistants were trained in techniques to promote open discussion. Focus  
251 groups typically lasted between 1 ½ to 2 hours.

252 The researchers on this study included individuals with knowledge and experience of MNCH at  
253 the national and international levels, and who had prior experience with health research in Liberia. Key  
254 research team members had prior experience with qualitative and quantitative research methods and  
255 research ethics. An in-person methods training was held to ensure high quality data across sites. Ongoing  
256 remote training and trouble-shooting was provided to the research team during the piloting and data  
257 collection stages of the study. To promote reflexivity, preliminary results were discussed at a workshop  
258 held after data collection and preliminary analysis was completed.

259 Following completion of the interviews and focus groups, audio recordings were transcribed by  
260 the research assistants and field notes incorporated into the transcript. Transcripts were coded and  
261 analyzed using the software Atlas.ti (Atlas.ti Scientific Software Development GmbH, Berlin, Germany)<sup>50</sup>.  
262 In keeping with a framework approach often used for qualitative, multidisciplinary health research,<sup>51-53</sup>  
263 deductive themes were determined *a priori* based on our conceptual framework of overarching  
264 questions. Additional inductive themes were also identified upon review of the transcripts. Deductive  
265 codes provided a useful way of comparing themes and concepts within and across countries. Text was  
266 coded and reviewed for patterns of consistency, variation, relationships between themes and exemplary  
267 cases or quotations<sup>54,55</sup>. Ethical approval was obtained from the Vanderbilt University Medical Center  
268 and the University of Liberia-Pacific Institute for Research and Evaluation.

### 269 **Patient involvement**

270 Patients were not involved in the design of this study. Results were disseminated to Ministry of  
271 Health and WHO representatives from Liberia, and a presentation and report detailing results were  
272 made available to these representatives to aid further dissemination to other stakeholders.

## 273 RESULTS

### 274 MNCH coverage Indicators

275  
276 Indicator coverage data from 2000 were not available for six of the thirteen core indicators (Fig  
277 2). Liberia has improved coverage of nine of these indicators during the study period. Highest current  
278 indicator coverage is seen for pregnant women receiving antenatal care (ANC) (96%), vitamin A  
279 supplementation (88%), pregnant women receiving at least four ANC visits (78%), and improved water  
280 sources (75%; Fig 2). Coverage was below 50% for improved sanitation (17%), postnatal visits within two  
281 days for deliveries (35%), use of insecticide-treated bednets (38%), and diarrhea treatment (46%; Fig 2).

### 282 Figure 2 here. **National document review and qualitative study**

#### 283 National Prioritization of MNCH

284 Both national documents and key informants at nearly all levels highlighted the strong  
285 commitment the Liberian government made to re-build the health care system soon after the civil war  
286 ended. Key informants and national documents also described how MNCH was prioritized, not just  
287 within the MOH, but also by top leadership throughout all sectors of the government. As an example of  
288 Liberia's high level commitment to MNCH, key informants described how maternal and neonatal deaths  
289 were reported directly to Liberia's president. Routine audits of maternal and neonatal deaths were  
290 undertaken by county health boards to identify problems with care, and improve accountability and  
291 oversight. Community women rarely specifically commented on the government's prioritization of  
292 MNCH, but some did express appreciation for the government's role in rebuilding services after the  
293 conflict. This prioritization of MNCH by multiple levels in the government is illustrated in the quotations  
294 below:

1  
2  
3 295 “I mean it has been a painfully slow process...to get government to that level of commitment but  
4  
5 296 a lot of progress, a lot of gain has been made and I can tell you for instance now the President of  
6  
7 297 Liberia is the president of the commission for women health in Africa and that’s under the WHO-  
8  
9  
10 298 AFRO, I can tell you that the government...had made maternal and newborn health one of the  
11  
12 299 conditions that will undergo surveillance, meaning that...maternal and newborn death should be  
13  
14 300 reported.” (49 year old, male donor partner)

15  
16  
17 301 “...I think all the things we do medication and everything government has been involved [in]...if  
18  
19 302 you have anybody dying from giving birth they have this audit in this particular team that reports  
20  
21 303 directly to the President of Liberia, so they are even involved in it...” (35 year old, female from  
22  
23 304 CBO partner)

24  
25  
26  
27 305 “[NGOs and the government] are giving us knowledge [on] how to take care of ourselves and  
28  
29 306 what to do when you are pregnant, where to go and where not to go and what for you to  
30  
31 307 eat...things have improved, because we having NGOs, we having government, we having UN,  
32  
33 308 many people coming in they helping us too. So things have improved bit by bit.” (39 year old,  
34  
35 309 rural woman with 4 children)

36  
37  
38  
39 310 Although child health has been recognized as an important priority by both the Liberian  
40  
41 311 government and donor partners, national health documents and key informant interviews all indicated  
42  
43 312 consistent concern that Liberia’s high dependence on donor aid is unsustainable. Many key informants  
44  
45 313 felt that the Liberian government’s relationship with donors had evolved such that donors no longer  
46  
47 314 drove the agenda, but rather accepted guidance from the government on priority areas and needs that  
48  
49 315 the donors could assist with. However, there were also some who felt that donors continued to have too  
50  
51 316 much involvement because of the high levels of funding they provided. Due to strong donor funding and  
52  
53 317 some government funding, most MNCH services were free during much of the study period, which key



1  
2  
3 318 informants and community women felt contributed to increased access and utilization. However, key  
4  
5 319 informants and national documents indicated that the government of Liberia needs to institutionalize  
6  
7 320 services currently provided by external partners and take more financial responsibility for the health  
8  
9 321 sector. The government was praised by a few participants for taking on a greater share of  
10  
11 322 responsibilities, such as vaccine procurement, but many acknowledged that the government needed to  
12  
13 323 sustain their involvement and investment to ensure gains were sustainable.  
14  
15

16  
17 324 “...we are donor dependent; the sources of funding either from the donor or the GOL  
18  
19 325 [Government of Liberia] but what comes into the ministry for maternal and child health issue is  
20  
21 326 very small but the input that partners are making if you count it, it’s very huge. So we think that  
22  
23 327 for sustainability the government needs to play more roles because if these partners leave, the  
24  
25 328 gains that we are making, to sustain it might be difficult...” (46 year old, female MOH official)  
26  
27  
28

### 29 329 The Development and Implementation of Integrated Packages of Services 30 31

32 330 Key informants indicated that the MOH did a good job of implementing extensive reforms of the  
33  
34 331 health system soon after the civil war, and continuous attempts to evaluate and update policies and  
35  
36 332 strategies to make gradual improvements. An often-cited example by key informants of this process was  
37  
38 333 the implementation of integrated packages of services, detailed in the quotations below:  
39  
40

41 334 “...I think there is an enabling environment from the government through the Ministry of Health  
42  
43 335 that is in place through the development of the ten years plan and the expanded program which  
44  
45 336 is the EPHS [Expanded Package of Health Services], which addresses child health and maternal  
46  
47 337 health, so first there is a will on the part of the government to address child health and maternal  
48  
49 338 health...” (49 year old, female donor partner)  
50  
51  
52

53 339  
54  
55

1  
2  
3 340 “...the Ministry of Health, from the beginning a postwar country had a policy first that was  
4  
5 341 guiding the process; the BPHS [Basic Packages of Health Services]...So it had bases on how people  
6  
7 342 should implement the policy and also as time went by, maternal services improved over time  
8  
9  
10 343 based on evaluation from the Ministry of Health and Social Welfare through their annual  
11  
12 344 accreditation looking at service delivery.” (35 year old, male donor partner)  
13

14  
15 345 Liberia’s National Health Policy and Plan<sup>56</sup> first focused on establishing the Basic Package of  
16  
17 346 Health Services (BPHS). National documents and key informants attributed rapid scale-up of MNCH  
18  
19 347 interventions immediately following the civil war to the effective framework set forth by the BPHS.  
20  
21 348 According to national documents, the BPHS also aimed to improve distribution and supervision of  
22  
23 349 healthcare providers through establishment of a salary scale, standardized job descriptions, and  
24  
25 350 supervision tools for all cadres. Although the BPHS is credited with restoring MNCH service delivery  
26  
27  
28 351 across Liberia, several key informants stated that the BPHS did not adequately integrate services across  
29  
30 352 different sectors of MNCH, which they felt hindered delivery of maternal health and family planning,  
31  
32 353 nutrition and PMTCT. Additionally, components of the BPHS intended to improve human resources for  
33  
34 354 health were not fully implemented or did not appear to have the intended impact, as many key  
35  
36  
37 355 informants and community women cited a lack of qualified and quality providers.  
38  
39

40 356 Recognizing the shortcomings of the BPHS, the National Health and Social Welfare Policy and  
41  
42 357 Plan<sup>57</sup> was developed and established the Essential Package of Health Services (EPHS) which aimed to  
43  
44 358 scale-up interventions (especially MNCH interventions), reduce inequities, improve collaboration across  
45  
46  
47 359 different sectors, and improve quality at secondary and tertiary healthcare centers. The EPHS also sought  
48  
49 360 to increase the number of skilled workers available for labor and delivery to ensure that emergency  
50  
51 361 obstetric and neonatal care (EmONC) is available at all facilities. Key informants were quite positive  
52  
53  
54 362 about the EPHS, feeling that it had improved collaboration between sectors and had improved quality of  
55

1  
2  
3 363 care in some areas. Some key informants also felt that the clearer language in the policy documents  
4  
5 364 enabled the government to better establish expectations and hold partners accountable when  
6  
7 365 implementation goals were not met.  
8  
9

10 366 "...from the BPHS to EPHS, it was EPHS they were able to strengthen that MCH part to include in  
11  
12 367 addition to nutrition, adolescence, reproductive health care and all of that sexual health but in  
13  
14 368 the past, those were very weak and gray areas; as long as the policy did not address them, they  
15  
16 369 became difficult for anyone to hold a partner accountable for any implementation. Uh, now, the  
17  
18 370 ministry has included that and there are more services." (47 year old, male CBO partner)  
19  
20  
21

22 371 However, some key informants felt that the EPHS had not been completely implemented at all  
23  
24 372 levels, particularly the primary care level, due to lack of resources, both human and financial. The  
25  
26 373 incomplete implementation limits not only delivery of MNCH interventions, but also the collaboration  
27  
28 374 and coordination the EPHS was intended to promote. In addition, both key informants and some  
29  
30 375 community women described continued shortages of healthcare providers, especially those trained in  
31  
32 376 delivery-related interventions, certified midwives, and pediatric specialists outside the capital of  
33  
34 377 Monrovia. As illustrated below, community women and key informants noted that limited availability of  
35  
36 378 MNCH providers and poor attitudes of providers remained a barrier to utilizing and accessing care.  
37  
38  
39

40  
41 379 "...When I gave birth, the girl that attended to me because she left, her shift was over...that night  
42  
43 380 I could die because I started bleeding right after giving birth. But because my friend was a nurse  
44  
45 381 she went there and attended to me that night. Those that were on shift that night... never had  
46  
47 382 time for me because nothing was there for me to tip in, so they just acted careless on [with] me."  
48  
49 383 (38 year old, urban woman with 4 children)  
50  
51  
52

53 384  
54 385 "Clinics are...not running 24/7 services, we have heard these challenges from them, people go  
55  
56

1  
2  
3 386 overnight with complaints and the health care provider says I am not paid for overnight services  
4  
5 387 so you have to wait until tomorrow; so lack of motivation at the service provider end is also  
6  
7 388 impeding the process.” (37 year old, male CBO partner)  
8  
9

10 389  
11  
12  
13 390 Although key informants were concerned about incomplete implementation of the EPHS, they  
14  
15 391 attributed improvements in malaria, PMTCT services, nutrition and reproductive health to the enhanced  
16  
17 392 integration between sectors that the EPHS provided, as illustrated below. Community women did not  
18  
19 393 specifically describe implementation of the EPHS or differentiate between levels of the healthcare  
20  
21 394 system, but did discuss the quality of care they received. Specifically, women felt very positive about the  
22  
23 395 care received during pregnancy and delivery, as well as educational and preventive services.  
24  
25  
26

27 396 “...I think it has changed...in the past we had the BPHS that provided minimum service at the  
28  
29 397 health facility where when the pregnant woman comes, they only check them and when they  
30  
31 398 have malaria, they treat them and they go home. But this time around, the BPHS has been  
32  
33 399 modified to EPHS and where, we look at a full package, the standards have improved, the  
34  
35 400 services have improved and they receive a whole package and deliver it to the mother...  
36  
37  
38 401 [including] PMTCT services, immunization, nutrition, and other laboratory findings so as to  
39  
40 402 reduce the number of visits, she has to do at the health facility.” (33 year old, male MOH official)  
41  
42  
43

44 403 “...the nurses and the doctors especially at the hospital here, whenever they carry pregnant  
45  
46 404 woman there, they always cater to the person and talk [to] the person in a polite manner, try to  
47  
48 405 help the person...They always treat us free and at time [delivery] they give baby’s clothes free of  
49  
50 406 charge.” (43 year old, rural woman with 6 children)  
51  
52

53 407  
54  
55  
56  
57  
58  
59  
60

1  
2  
3 408 “...when you give birth and the baby is growing up, you don’t have to wait for the child to fall sick  
4  
5 409 before you carry the child to hospital. You can take the child to hospital so the child will get  
6  
7 410 drugs [anti-malaria prophylaxis]...” (35 year old, urban woman with 4 children)  
8  
9

10 411  
11 412 Community outreach and service delivery  
12

13  
14 413 Liberia’s use of community outreach and service delivery was a third overarching factor  
15  
16 414 identified as facilitating achievement of MDG#4. The national Community Health Services Policy first  
17  
18 415 issued in 2008 and revised in 2011<sup>58</sup> outlined a standard set of outreach, health promotion and referral  
19  
20 416 services. This policy also specified the roles and responsibilities of community-based staff including  
21  
22 417 general community health volunteers (GCHVs) and Trained Traditional Midwives (TTMs). It further  
23  
24 418 outlined how they should be distributed geographically, supervised, evaluated, and that TTMs are to be  
25  
26 419 compensated with monthly salaries while GCHVs work as volunteers but receive an incentive package.  
27  
28 420 Both key informants and community women were positive about their efforts at the community level,  
29  
30 421 recognizing how these cadres enhance referrals from the community to healthcare facilities and follow-  
31  
32 422 up with mothers and children in the community after they return home. GCHVs and TTMs were also  
33  
34 423 highly valued by community women for their assistance with the outreach campaigns--“Reach Every  
35  
36 424 District” (RED) and “Reach Every Pregnancy” (REP)-- to improve immunization coverage and maternal  
37  
38 425 health, respectively. Both key informants and community women further described that GCHVs and  
39  
40 426 TTMs had likely increased coverage of antenatal and post-natal care by connecting women with the  
41  
42 427 healthcare system earlier in pregnancy and increased immunization coverage through mobile  
43  
44 428 vaccination sites, and improved community-based education and communication.  
45  
46  
47  
48

49  
50 429 “...the vaccine team most of the time come around to give our children vaccine and deworm  
51  
52 430 them with the medicine. At time we can see some people with the megaphone  
53  
54 431 educating...pregnant women on how to take care of your children and even how to take care of  
55

1  
2  
3 432 your community. As for the health campaign we can see them and we can benefit from them.”

4  
5 433 (38 year old, urban woman with 3 children)

6  
7  
8 434 “Number one thing that is trying to work well is the TTMs and GCHVs, they are trying their best

9  
10 435 with the referrals. They get any patient in the community, they bring them here... we have family

11  
12 436 planning, we have EPI under MCH, we have PMTCT, ANC, labor and delivery, post-partum care

13  
14 437 provided...The only problem we have with our GCHVs is that they are saying they are not been

15  
16 438 compensated so we don't expect them to work full time.” (43 year old, female health care

17  
18 439 worker)

19  
20  
21  
22 440 While attributing success at the community level to the efforts of GCHVs and TTMs, study

23  
24 441 participants also felt these staff needed better compensation beyond what is currently provided to

25  
26 442 enable them to work more often. The insufficient number of GCHVs and TTMs was also cited as a

27  
28 443 challenge affecting availability of health services. Key informants and national documents noted that due

29  
30 444 to limited human and financial resources, local health clinics were not always staffed and community-

31  
32 445 based interventions such as the RED and REP campaigns had not been implemented or adequately

33  
34 446 supported in all areas.

35  
36  
37  
38 447 “...I remember some time ago they were trying to integrate the...reach every pregnant women;

39  
40 448 reach every district...but for the reach every pregnant woman actually it is not working 100%. If I

41  
42 449 will have to grade it may be it is working around 40 to 45% because of may be some supplies

43  
44 450 that supposed to be given or put into place it is not into place...” (34 year old, female CBO

45  
46 451 partner)

47  
48  
49  
50 452 **DISCUSSION**

1  
2  
3 453 This case study identifies three components that have likely contributed to Liberia's rapid post-  
4  
5 454 conflict decline in under-five mortality and attainment of MDG#4. First, the Liberian government made  
6  
7 455 re-establishment and funding of MNCH a top priority as it rebuilt its health system after the civil war.  
8  
9 456 Second, the development and implementation of integrated packages of services, first the BPHS followed  
10  
11 457 by the EPHS, enabled Liberia to restore basic MNCH services and scale-up interventions at all levels of  
12  
13 458 the healthcare system. The development and implementation of the BPHS and EPHS also demonstrated  
14  
15 459 Liberia's ability to evaluate and re-work policies and strategies. The EPHS fostered further integration  
16  
17 460 and collaboration across multiple sectors, which allowed for expansion of PMTCT, nutrition, and other  
18  
19 461 MNCH services. The EPHS also sought to improve the availability of trained health workers and fully  
20  
21 462 functional health units, although challenges persisted despite these efforts. Third, provision of services at  
22  
23 463 the community level, such as outreach campaigns and use of GHCVs and TTMs to deliver basic MNCH  
24  
25 464 interventions, contributed to improved coverage of ANC, post-natal care, and immunizations, and also  
26  
27 465 improved access and continuity of care in post-conflict Liberia by strengthening referrals between the  
28  
29 466 community and healthcare facilities.  
30  
31  
32  
33  
34

35 467 Liberia utilized a healthcare system recovery approach that has shown promise in other post-  
36  
37 468 conflict or conflict-affected settings. Specifically, Kruk, et al. (2010) emphasize the need for strong  
38  
39 469 national leadership and governance that makes restoration of basic health services a top national  
40  
41 470 priority. They also documented that, when a national government makes a strong commitment to  
42  
43 471 providing healthcare to the most vulnerable populations (such as women and children), this commitment  
44  
45 472 can contribute to the country's long-term stability and recovery efforts. A basic package of health  
46  
47 473 services enabling rapid roll-out and scale-up of MNCH and other primary health services has also been  
48  
49 474 deployed with some success in Afghanistan, South Sudan, Rwanda, and Bosnia and Herzegovina<sup>59-63</sup>, and  
50  
51 475 is specifically recommended for conflict-affected settings<sup>4,12</sup>. These packages of services typically include  
52  
53 476 key MNCH interventions, nutrition, and treatment for communicable diseases (such as TB and HIV)<sup>59-65</sup>.  
54  
55  
56  
57  
58  
59  
60

1  
2  
3 477 Afghanistan, like Liberia, revised their basic package to also include additional services (for disability and  
4  
5 478 mental health), recognizing the specific needs of their population and the gaps in their original package.  
6  
7 479 Researchers have suggested that integrated packages of services may help in initial scale-up and  
8  
9 480 improvements, but require additional inputs and adjustments to sustain these improvements<sup>59 60 62 66</sup>.

11  
12 481 Community-level education, empowerment, and outreach are also recommended to improve  
13  
14 482 utilization and access to basic interventions and improve referrals from the community to the facility  
15  
16 483 levels<sup>4 67-70</sup>. Expanding cadres of traditional birth attendants and community health workers has been  
17  
18 484 found to be particularly key in restoring maternal and neonatal services in conflict-affected settings<sup>59 71-</sup>  
19  
20 485 <sup>75</sup>. Community health workers and community-level outreach and service delivery has also been a key  
21  
22 486 factor in the successes of other countries successfully reducing child mortality<sup>30-34 38 76</sup>. Although many  
23  
24 487 conflict-affected settings have difficulties with referrals<sup>67 77 78</sup>, this is one area where Liberia appears to  
25  
26 488 have made great progress through their use of GCHVs and TTMs, as described by key informants and  
27  
28 489 community women.

31  
32 490 Although Liberia has made significant progress in MNCH, national documents and study  
33  
34 491 participants noted a number of challenges that persist and need to be addressed as Liberia moves  
35  
36 492 forward to achieve their post-2015 goals<sup>79</sup>. This includes their severe shortage of healthcare providers,  
37  
38 493 particularly community-based midwives and child health providers in rural areas. The lack of healthcare  
39  
40 494 providers and challenges associated with training and retaining general and MNCH providers is well-  
41  
42 495 documented in the literature from other conflict-affected countries where brain-drain is common during  
43  
44 496 and after conflict<sup>4 12 59 67 69 80-83</sup>. Another weakness described in the study is Liberia's high dependence on  
45  
46 497 donor aid to provide many of the MNCH services. Although heavy reliance on donor aid is consistent  
47  
48 498 with other conflict-affected countries, there is little consensus on how donors can best support post-  
49  
50 499 conflict countries and few recommendations as to how and when post-conflict settings should make the  
51  
52 500 transition from donor-provided services to government-provided services<sup>84-86</sup>. An emphasis on



1  
2  
3 501 increased government stewardship of the healthcare system, particularly with respect to the  
4  
5 502 government taking a key role in determining partner expectations and roles and contracting directly with  
6  
7 503 partners comprises one set of recommendations.<sup>87-89</sup> Liberia's relationships with donors appears to have  
8  
9 504 evolved in line with this recommendation, however additional progress is still needed. The literature also  
10  
11 505 cautions that the time horizon for moving away from donor dependence in conflict-affected states may  
12  
13  
14 506 be lengthy and is not necessarily linear as a state's stability may not always follow a linear trajectory.<sup>85,87</sup>  
15

16 507 This study provides one of the few country-case studies to assess progress towards achieving  
17  
18 508 MDG#4. Perhaps more importantly, it provides much needed insight into MNCH infrastructure and  
19  
20 509 experiences from an understudied, post-conflict, yet highly successful African country. This case-study  
21  
22 510 utilized a number of data sources, including national indicator data, country-authored health policies and  
23  
24 511 strategies, and qualitative data from key informants with different roles in MNCH and four focus group  
25  
26 512 discussions with women from urban and rural areas. By bringing together diverse sources of data, this  
27  
28 513 study was able to assess the national-level measures used to enhance child survival and the facilitators  
29  
30 514 and challenges that affected full implementation and impact.  
31  
32  
33

34 515 There are limitations in our study. For the review of national MNCH policies and strategies, new  
35  
36 516 policies and strategies were not issued until after 2007 due to the civil war. While these documents  
37  
38 517 contained a retrospective assessment of the preceding period, assessments of the impact of more recent  
39  
40 518 policies or strategies were not yet available. Moreover, country policies and strategies covered different  
41  
42 519 and sometimes overlapping time periods, making it difficult to distinguish current from outdated  
43  
44 520 information, and whether a stated plan had been implemented unless stated. Input from co-authors  
45  
46 521 affiliated with the WHO and the MOH helped to clarify uncertainty.  
47  
48  
49

50 522 With regards to the interviews and focus groups, this study was limited to a non-random sample  
51  
52 523 of participants and conducted in two counties (one urban, one rural). Changes in under-five mortality in  
53  
54 524 these areas may not reflect changes at the national level and local views and experiences may not reflect

1  
2  
3 525 those from other areas. However, participants were selected to represent five different cadres of  
4  
5 526 individuals who could share a diversity of MNCH experiences, including some key informants with  
6  
7 527 national-level responsibilities and 37 women from the community. Most of the participants recalled their  
8  
9  
10 528 current experiences and opinions on MNCH, and we gained less insight as to long-term changes.

11  
12 529 Our study contributes to the growing literature on effective approaches to scaling-up availability  
13  
14 530 and use of MNCH services in conflict-affected settings. The factors identified as contributing to Liberia's  
15  
16 531 success in reducing under-five mortality can be applied in the many other countries recovering from  
17  
18 532 conflict, and is relevant to Liberia's recovery from the 2014-2015 Ebola epidemic. To further improve the  
19  
20  
21 533 delivery of essential health services and reduce under-five mortality in the post-2015 era, Liberia must  
22  
23 534 maintain the health and welfare of pregnant women and children as a top priority, conduct  
24  
25 535 comprehensive evaluation and enhancement of programs and interventions, increase government  
26  
27  
28 536 responsibility for service delivery to reduce donor dependence, and ensure that sufficient human and  
29  
30 537 financial resources enable MNCH service delivery close to the population.

31  
32 538

33  
34 539

#### 35 36 540 Acknowledgements

37  
38 541 We thank the African Region of the World Health Organization for their support for this research and the  
39 542 research participants for sharing their time, experiences and opinions. The research assistants for the  
40 543 qualitative portion of the study were Wede M. Nagbe and Curtis H. Taylor who conducted and  
41 544 transcribed the interviews and focus group discussions.

#### 42 43 545 Funding

44  
45 546 AC is an employee of Liberia's Ministry of Health. PH and KM are employees of the World Health  
46 547 Organization. No other authors have competing interests. Funding for this project was provided by the  
47 548 World Health Organization Regional Office for Africa. Support for data management came from the  
48 549 Vanderbilt Institute for Clinical and Translational Research (grant UL1 TR000445 from the National  
49 550 Center for Advancing Translational Sciences at the National Institutes of Health). At the time of the  
50 551 study, Dr. Kipp was a Scholar with the HIV/AIDS, Substance Abuse, and Trauma Training Program (HA-  
51 552 STTP), at the University of California, Los Angeles; supported through an award from the National  
52 553 Institute on Drug Abuse at the National Institutes of Health (R25 DA035692).

#### 53 54 554 Authors' contributions

1  
2  
3 555 Brault: Involved in conceptualization of research, development of methodology, data collection, data  
4 556 analysis, data management, and manuscript development.

5  
6 557 Kennedy: Involved in development of methodology, data collection, data management, and manuscript  
7 558 development.

8  
9 559 Haley: Involved in conceptualization of research, development of methodology, data collection, data  
10 560 analysis, data management, and manuscript development.

11  
12 561 Clarke: Involved in development of methodology, provision of study resources, and manuscript  
13 562 development.

14  
15 563 Duworko: Involved in development of methodology, provision of study resources, and manuscript  
16 564 development.

17  
18 565 Habimana: Involved in conceptualization of research, development of methodology, funding acquisition,  
19 566 and manuscript development.

20  
21 567 Vermund: Involved in conceptualization of research, development of methodology, funding acquisition,  
22 568 and manuscript development.

23  
24 569 Kipp: Involved in conceptualization of research, project administration, development of methodology,  
25 570 funding acquisition, data collection, data analysis, data management, and manuscript development.

26  
27 571 Mwinga: Involved in conceptualization of research, project administration, development of  
28 572 methodology, funding acquisition, provision of study resources, and manuscript development.

29  
30  
31 573 Data sharing statement

32  
33 574 Annual mortality estimates used in Figure 1 are publicly available, without restriction, from  
34 575 [http://www.childmortality.org/index.php?r=site/graph#ID=LBR\\_Liberia](http://www.childmortality.org/index.php?r=site/graph#ID=LBR_Liberia). Indicator data used for Figure 2  
35 576 are publicly available, without restriction, from the World Development Index, Africa Development  
36 577 Index, and Health Nutrition & Population Statistics databases of the World Bank Data Catalog  
37 578 (<http://data.worldbank.org/data-catalog/>) or Liberia Demographic and Health Survey reports available at  
38 579 [http://dhsprogram.com/Where-We-Work/Country-Main.cfm?ctry\\_id=22&c=Liberia&r=1](http://dhsprogram.com/Where-We-Work/Country-Main.cfm?ctry_id=22&c=Liberia&r=1). A detailed  
39 580 description of each indicator's source can be found in the supplemental material from a previously  
40 581 published study (Kipp et al. BMJ Open. 2016. <http://dx.doi.org/10.1136/bmjopen-2015-007675>).

41  
42  
43 582 Supplemental table S1 lists the national documents reviewed for the study. These were obtained with  
44 583 the permission and assistance of the Liberian co-authors and do not belong to any of the individual study  
45 584 authors. As such, they cannot be made available as they belong to the Ministry of Health or other  
46 585 agencies and some are still in draft form. Links to publicly available documents are provided in  
47 586 Supplemental table S1. For investigators wishing to obtain other policy documents used in this study,  
48 587 please contact Mr. Luke Bawo, Coordinator for Research and Health Management Information System,  
49 588 Ministry of Health, email: [lukebawo@gmail.com](mailto:lukebawo@gmail.com); or Hon. C. Sanford Wesseh, Assistant Minister for Vital  
50 589 Statistics, Ministry of Health, email: [cswesseh@yahoo.com](mailto:cswesseh@yahoo.com).

51  
52  
53 590 Under the Agreement for Performance of Work with the World Health Organization (sponsor) that was  
54 591 used for this study, all rights to the data collected from key informants and community women belong to

1  
2  
3 592 the WHO. The WHO will entertain any reasonable proposal for use of the data. Researchers who are  
4 593 qualified to manage and analyze qualitative data may request these data from Dr. Phaniel Habimana,  
5 594 Team Leader, Child and Adolescent Health and Nutrition, WHO Regional Office for Africa, Brazzaville,  
6 595 Congo; email: habimanap@who.int.

8 596 Interview, focus group discussion, and national document abstraction guides are available upon request  
9 597 from the corresponding author; email: [aaron.kipp@vanderbilt.edu](mailto:aaron.kipp@vanderbilt.edu). These data are not considered part  
10 598 of the underlying data necessary to replicate the study.

12  
13 599 Figure legends

14 600 Fig 1. Under-five, infant, and neonatal mortality rates for Liberia in 1990, 2000, 2010, and 2015 (solid  
15 601 circles) with annual rates of reduction (ARR) for each period (solid and dashed lines).

17 602  
18  
19 603 Source: Levels and Trends in Child Mortality: Report 2015 - Estimates Developed by the United Nations  
20 604 Inter-agency Group for Child Mortality Estimation <sup>1</sup>. Report and data accessed July 2015 from  
21 605 [www.childmortality.org](http://www.childmortality.org).

22 606 Fig 2. Changes in child survival indicator coverage in Liberia, 2000, 2007, and 2013\*.

23 607 \*Estimates were not always available for years 2000, 2007, and 2013, in which case the nearest estimate  
24 608 between 1999 and 2000, 2005 and 2007, or 2012 and 2013 was used; data were not available for the six  
25 609 indicators showing an asterisk (\*) during the 2000 time period.

26 610 <sup>†</sup>Among all births, both inside and outside a health facility

27 611 <sup>‡</sup>Children 12-23 months old who have received BCG, measles and three doses each of DPT and polio  
28 612 vaccine (excluding polio vaccine given at birth)

29 613 <sup>§</sup>Children under 5 receiving oral rehydration and continued feeding

30 614 Source: World Development Indicators Data Catalogue from the World Bank

31 615 (<http://datacatalog.worldbank.org>; accessed August 2015) and Liberia DHS

32 616

33 617

## 618 REFERENCES

- 619 1. UNICEF, WHO, World Bank, et al. Levels and Trends in Child Mortality: Report 2015 - Estimates  
620 Developed by the United Nations Inter-agency Group for Child Mortality Estimation. New York:  
621 UNICEF. (accessed July 2015 from [www.childmortality.org](http://www.childmortality.org)), 2015.
- 622 2. United Nations. United Nations Millennium Declaration: United Nations; 2000 [Available from:  
623 <http://www.un.org/millennium/declaration/ares552e.htm> accessed February 2013.
- 624 3. Liberia Ministry of Health and Social Welfare (MoHSW). Country Situational Analysis Report.  
625 Monrovia, Liberia: Ministry of Health and Social Welfare 2011.
- 626 4. Bornemisza O, Ranson MK, Poletti TM, et al. Promoting health equity in conflict-affected fragile states.  
627 *Soc Sci Med* 2010;70(1):80-8. doi: 10.1016/j.socscimed.2009.09.032
- 628 5. Tubman VN, Marshall R, Jallah W, et al. Newborn Screening for Sickle Cell Disease in Liberia: A Pilot  
629 Study: Newborn Screening for Sickle Cell in Liberia. *Pediatric Blood & Cancer* 2016;63(4):671-76.  
630 doi: 10.1002/pbc.25875
- 631 6. Tsai C, Walters C, Sampson J, et al. Pediatric Mortality in a Rural Tertiary Care Center in Liberia.  
632 *Children* 2017;4(2):8. doi: 10.3390/children4020008
- 633 7. Sipsma H, Callands TA, Bradley E, et al. Healthcare utilisation and empowerment among women in  
634 Liberia. *Journal of Epidemiology and Community Health (1979-)* 2013;67(11):953-59. doi:  
635 10.1136/jech-2013-202647
- 636 8. Luginaah IN, Kangmennaang J, Fallah M, et al. Timing and utilization of antenatal care services in  
637 Liberia: Understanding the pre-Ebola epidemic context. *Social science & medicine* 2016;160:75-  
638 86. doi: 10.1016/j.socscimed.2016.05.019
- 639 9. Kenny A, Basu G, Ballard M, et al. Remoteness and maternal and child health service utilization in rural  
640 Liberia: A population-based survey. *JOURNAL OF GLOBAL HEALTH* 2015;5(2):48-59. doi:  
641 10.7189/jogh.05.020401
- 642 10. Gartland MG, Taryor VD, Norman AM, et al. Access to facility delivery and caesarean section in north-  
643 central Liberia: a cross-sectional community-based study. *BMJ open* 2012;2(6):e001602.
- 644 11. Kentoffio K, Kraemer JD, Griffiths T, et al. Charting health system reconstruction in post-war Liberia: a  
645 comparison of rural vs. remote healthcare utilization. *BMC HEALTH SERVICES RESEARCH*  
646 2016;16(1):478. doi: 10.1186/s12913-016-1709-7
- 647 12. Kruk ME, Rockers PC, Williams EH, et al. Availability of essential health services in post-conflict  
648 Liberia. *Bulletin of the World Health Organization* 2010;88(7):527-34. doi:  
649 10.2471/BLT.09.071068
- 650 13. Lori JR, Rominski S, Osher BF, et al. A case series study of perinatal deaths at one referral center in  
651 rural post-conflict Liberia. *Matern Child Health J* 2014;18(1):45-51. doi: 10.1007/s10995-013-  
652 1232-y
- 653 14. Smith JM, Baawo SD, Subah M, et al. Advance distribution of misoprostol for prevention of  
654 postpartum hemorrhage (PPH) at home births in two districts of Liberia. *BMC Pregnancy*  
655 *Childbirth* 2014;14:189. doi: 10.1186/1471-2393-14-189
- 656 15. Solanke BL, Amoo EO, Idowu AE. Improving postnatal checkups for mothers in West Africa: A  
657 multilevel analysis. *Women & Health* 2017:1-25.
- 658 16. Lori JR, Munro ML, Moore JE, et al. Lessons learned in Liberia: preliminary examination of the  
659 psychometric properties of trust and teamwork among maternal healthcare workers. *BMC*  
660 *health services research* 2013;13(1):134.
- 661 17. Lori JR, Munro-Kramer ML, Shifman J, et al. Patient satisfaction with maternity waiting homes in  
662 Liberia: a case study during the Ebola outbreak. *Journal of Midwifery & Women's Health*  
663 2017;62(2):163-71.

- 1  
2  
3 664 18. Lori JR, Starke AE. A critical analysis of maternal morbidity and mortality in Liberia, West Africa.  
4 665 *Midwifery* 2012;28(1):67-72.
- 5 666 19. Lori JR, Wadsworth AC, Munro ML, et al. Promoting access: The use of maternity waiting homes to  
6 667 achieve safe motherhood. *Midwifery* 2013;29(10):1095-102.
- 7 668 20. Cooper CM, Fields R, Mazzeo CI, et al. Successful proof of concept of family planning and  
8 669 immunization integration in Liberia. *Glob Health Sci Pract* 2015;3(1):71-84. doi: 10.9745/GHSP-D-  
9 670 14-00156
- 10 671 21. Guyon A, Bock A, Buback L, et al. Mobile-Based Nutrition and Child Health Monitoring to Inform  
11 672 Program Development: An Experience From Liberia. *Global Health: Science and Practice*  
12 673 2016;4(4):661-70. doi: 10.9745/GHSP-D-16-00189
- 13 674 22. Munro ML, Lori JR, Boyd CJ, et al. Knowledge and Skill Retention of a Mobile Phone Data Collection  
14 675 Protocol in Rural Liberia. *Journal of Midwifery & Women's Health* 2014;59(2):176-83. doi:  
15 676 10.1111/jmwh.12155
- 16 677 23. Luckow PW, Kenny A, White E, et al. Implementation research on community health workers'  
17 678 provision of maternal and child health services in rural Liberia. *Bulletin of the World Health*  
18 679 *Organization* 2017;95(2):113-20. doi: 10.2471/BLT.16.175513
- 19 680 24. Lori JR, Majszak CM, Martyn KK. Home-Based Life-Saving Skills in Liberia: Acquisition and Retention of  
20 681 Skills and Knowledge. *Journal of Midwifery and Women's Health* 2010;55(4):370-77. doi:  
21 682 10.1016/j.jmwh.2009.09.016
- 22 683 25. Lori J. Maternity waiting homes and traditional midwives in rural Liberia. *International Journal of*  
23 684 *Gynecology and Obstetrics* 2013;123:114-18.
- 24 685 26. Shoman H, Karafillakis E, Rawaf S. The link between the West African Ebola outbreak and health  
25 686 systems in Guinea, Liberia and Sierra Leone: a systematic review. *GLOBALIZATION AND HEALTH*  
26 687 2017;13(1) doi: 10.1186/s12992-016-0224-2
- 27 688 27. Iyengar P, Kerber K, Howe CJ, et al. Services for mothers and newborns during the ebola outbreak in  
28 689 Liberia: the need for improvement in emergencies. *PLoS currents* 2015;7 doi:  
29 690 10.1371/currents.outbreaks.4ba318308719ac86fbef91f8e56cb66f
- 30 691 28. Ly J, Sathanathan V, Griffiths T, et al. Facility-Based Delivery during the Ebola Virus Disease Epidemic  
31 692 in Rural Liberia: Analysis from a Cross-Sectional, Population-Based Household Survey. *PLoS*  
32 693 *medicine* 2016;13(8):e1002096. doi: 10.1371/journal.pmed.1002096
- 33 694 29. Fallah MP, Skrip LA, Dahn BT, et al. Pregnancy outcomes in Liberian women who conceived after  
34 695 recovery from Ebola virus disease. *The Lancet Global health* 2016;4(10):e678-e79. doi:  
35 696 10.1016/S2214-109X(16)30147-4
- 36 697 30. Mbonye AK, Sentongo M, Mukasa GK, et al. Newborn survival in Uganda: a decade of change and  
37 698 future implications. *Health policy and planning* 2012;27 Suppl 3:iii104-17. doi:  
38 699 10.1093/heapol/czs045
- 39 700 31. Kuruvilla S, Schweitzer J, Bishai D, et al. Success factors for reducing maternal and child mortality. *Bull*  
40 701 *World Health Organ* 2014;92(7):533-44B. doi: 10.2471/BLT.14.138131
- 41 702 32. Afnan-Holmes H, Magoma M, John T, et al. Tanzania's Countdown to 2015: an analysis of two  
42 703 decades of progress and gaps for reproductive, maternal, newborn, and child health, to inform  
43 704 priorities for post-2015. *The Lancet Global Health* 2015;3(7):e396-e409.
- 44 705 33. Amouzou A, Habi O, Bensaïd K, et al. Reduction in child mortality in Niger: a Countdown to 2015  
45 706 country case study. *The Lancet* 2012;380(9848):1169-78.
- 46 707 34. Zimba E, Kinney MV, Kachale F, et al. Newborn survival in Malawi: a decade of change and future  
47 708 implications. *Health policy and planning* 2012;27(suppl\_3):iii88-iii103.

- 1  
2  
3 709 35. Brault MA, Ngure K, Haley CA, et al. The introduction of new policies and strategies to reduce  
4 710 inequities and improve child health in Kenya: A country case study on progress in child survival,  
5 711 2000-2013. *PLoS one* 2017;12(8):e0181777. doi: 10.1371/journal.pone.0181777  
6 712  
7 713 36. Haley CA, Vermund SH, Moyo P, et al. Impact of a critical health workforce shortage on child health in  
8 714 Zimbabwe: a country case study on progress in child survival, 2000–2013. *Health policy and*  
9 715 *planning* 2017:czw162.  
10 716 37. Kipp AM, Blevins M, Haley CA, et al. Factors associated with declining under-five mortality rates from  
11 717 2000 to 2013: an ecological analysis of 46 African countries. *BMJ open* 2016;6(1):e007675. doi:  
12 718 10.1136/bmjopen-2015-007675  
13 719 38. Kipp AM, Maimbolwa M, Brault MA, et al. Improving access to child health services at the community  
14 720 level in Zambia: a country case study on progress in child survival, 2000–2013. *Health policy and*  
15 721 *planning* 2016:czw141.  
16 722 39. World Bank. The World Bank Data Catalog [Available from: <http://datacatalog.worldbank.org/>  
17 723 accessed August 2015].  
18 724 40. Liberia Institute of Statistics and Geo-Information Services (LISGIS), Ministry of Health and Social  
19 725 Welfare [Liberia], National AIDS Control Program [Liberia], et al. Liberia Demographic and Health  
20 726 Survey 2013. Monrovia, Liberia: LISGIS and ICF International, 2014.  
21 727 41. Liberia Institute of Statistics and Geo-Information Services (LISGIS) [Liberia], Ministry of Health and  
22 728 Social Welfare [Liberia], National AIDS Control Program [Liberia], et al. Liberia Demographic and  
23 729 Health Survey 2007. Monrovia, Liberia: Liberia Institute of Statistics and Geo-Information  
24 730 Services (LISGIS) and Macro International Inc, 2008.  
25 731 42. WHO. Child Survival: A Strategy for the African Region. Brazzaville: World Health Organization,  
26 732 Regional Office for Africa, 2006.  
27 733 43. Organization WH. Everybody's business--strengthening health systems to improve health outcomes:  
28 734 WHO's framework for action. 2007  
29 735 44. Ban K. Global Strategy for Women's and Children's Health. New York: United Nations. 2010  
30 736 45. Countdown to 2015 Decade Report (2000-2010): Taking stock of maternal, newborn, and child  
31 737 survival. *WHO and UNICEF* 2010  
32 738 46. WHO, PMNCH. A global review of the key interventions related to reproductive, maternal, newborn  
33 739 and child health (RMNCH). *WHO and The Partnership for Maternal Newborn & Child Health*  
34 740 *(PMNCH)*, Geneva, Switzerland 2011  
35 741 47. Organization WH. Keeping Promises, Measuring Results: Commission on Information and  
36 742 Accountability for Women's and... Children's Health: World Health Organization 2012.  
37 743 48. Chieh-Johnson D, Cross A, Way A, et al. Liberia Demographic and Health Survey 1986. Columbia,  
38 744 Maryland, USA: Monrovia, Liberia and Columbia, Maryland: Bureau of Statistics [Liberia],  
39 745 Ministry of Planning and Economic Affairs, and Institute for Resource  
40 746 Development/Westinghouse, 1988.  
41 747 49. Collins D. Pretesting Survey Instruments: An Overview of Cognitive Methods. *Quality of Life Research*  
42 748 2003;12(3):229-38. doi: 10.1023/A:1023254226592  
43 749 50. Murh T. User's Manual for Atlas. ti 6.0. *Berlin: Atlas ti* 2004  
44 750 51. Bradley EH. Qualitative Data Analysis for Health Services Research: Developing Taxonomy, Themes,  
45 751 and Theory. *Health services research* 2007;42(4):1758-72. doi: 10.1111/j.1475-  
46 752 6773.2006.00684.x  
47 753 52. Gale NK, Heath G, Cameron E, et al. Using the framework method for the analysis of qualitative data  
48 754 in multi-disciplinary health research. *BMC medical research methodology* 2013;13(1):117.  
49 755 53. LeCompte MD, Schensul JJ. Analysis and interpretation of ethnographic data: A mixed methods  
50 approach: Rowman Altamira 2012.

- 1  
2  
3 756 54. Nastasi BK, Schensul SL. Contributions of qualitative research to the validity of intervention research.  
4 757 *Journal of School Psychology* 2005;43(3):177-95.  
5 758 55. Schensul SL. Using ETHNOGRAPH to build a survey instrument. *Field Methods* 1993;5(2)  
6 759 56. Liberia Ministry of Health and Social Welfare (MoHSW). The National Health Policy and Plan, 2007-  
7 760 2011. Monrovia, Liberia: Ministry of Health and Social Welfare, 2007.  
8 761 57. Liberia Ministry of Health and Social Welfare (MoHSW). National Health and Social Welfare Policy  
9 762 and Plan 2011-2021. Monrovia, Liberia: Ministry of Health and Social Welfare 2011.  
10 763 58. Liberia Ministry of Health and Social Welfare (MoHSW). Revised National Community Health Services  
11 764 Policy. Monrovia, Liberia: Ministry of Health and Social Welfare 2011.  
12 765 59. Howard N, Woodward A, Patel D, et al. Perspectives on reproductive healthcare delivered through a  
13 766 basic package of health services in Afghanistan: a qualitative study. *BMC health services research*  
14 767 2014;14:359. doi: 10.1186/1472-6963-14-359  
15 768 60. Roberts B, Guy S, Sondorp E, et al. A basic package of health services for post-conflict countries:  
16 769 implications for sexual and reproductive health services. *Reprod Health Matters* 2008;16(31):57-  
17 770 64. doi: 10.1016/S0968-8080(08)31347-0  
18 771 61. Hrabac B, Ljubic B, Bagaric I. Basic package of health entitlements and solidarity in the Federation of  
19 772 Bosnia and Herzegovina. *Croatian medical journal* 2000;41(3):287-93.  
20 773 62. Newbrander W, Ickx P, Feroz F, et al. Afghanistan's basic package of health services: its development  
21 774 and effects on rebuilding the health system. *Global public health* 2014;9(sup1):S6-S28.  
22 775 63. Newbrander W, Waldman R, Shepherd-Banigan M. Rebuilding and strengthening health systems and  
23 776 providing basic health services in fragile states. *Disasters* 2011;35(4):639-60.  
24 777 64. Liberia Ministry of Health and Social Welfare (MoHSW) Essential Package of Health Services for  
25 778 Primary Care: The Community Health System. Monrovia, Liberia: Ministry of Health and Social  
26 779 Welfare, 2011.  
27 780 65. Liberia Ministry of Health and Social Welfare (MoHSW). Essential Package of Health Services for  
28 781 Secondary & Tertiary Care: The District, County & National Health Systems. Monrovia, Liberia:  
29 782 Ministry of Health and Social Welfare, 2011.  
30 783 66. Petit D, Sondorp E, Mayhew S, et al. Implementing a Basic Package of Health Services in post-conflict  
31 784 Liberia: Perceptions of key stakeholders. *Social Science and Medicine* 2013;78(1):42-49. doi:  
32 785 10.1016/j.socscimed.2012.11.026  
33 786 67. Leather A, Ismail EA, Ali R, et al. Working together to rebuild health care in post-conflict Somaliland.  
34 787 *Lancet* 2006;368(9541):1119-25. doi: 10.1016/S0140-6736(06)69047-8  
35 788 68. Morikawa MJ, Schneider S, Becker S, et al. Primary care in post-conflict rural northern Afghanistan.  
36 789 *Public Health* 2011;125(1):55-9. doi: 10.1016/j.puhe.2010.08.021  
37 790 69. Nagai M, Abraham S, Okamoto M, et al. Reconstruction of health service systems in the post-conflict  
38 791 Northern Province in Sri Lanka. *Health Policy* 2007;83(1):84-93. doi:  
39 792 10.1016/j.healthpol.2006.12.001  
40 793 70. Ho LS, Labrecque G, Batonon I, et al. Effects of a community scorecard on improving the local health  
41 794 system in Eastern Democratic Republic of Congo: qualitative evidence using the most significant  
42 795 change technique. *Conflict and Health* 2015;9(1):27. doi: 10.1186/s13031-015-0055-4  
43 796 71. Gopalan SS, Das A, Howard N. Maternal and neonatal service usage and determinants in fragile and  
44 797 conflict-affected situations: a systematic review of Asia and the Middle-East. *BMC WOMENS*  
45 798 *HEALTH* 2017;17(1) doi: 10.1186/s12905-017-0379-x  
46 799 72. Krause SK, Meyers JL, Friedlander E. Improving the availability of emergency obstetric care in conflict-  
47 800 affected settings. *Global Public Health* 2006;1(3):205-28. doi: 10.1080/17441690600679939  
48  
49  
50  
51  
52  
53  
54  
55  
56  
57  
58  
59



- 1  
2  
3 801 73. Miyake S, Speakman EM, Currie S, et al. Community midwifery initiatives in fragile and conflict-  
4 802 affected countries: a scoping review of approaches from recruitment to retention. *Health policy*  
5 803 *and planning* 2017;32(1):21-33. doi: 10.1093/heapol/czw093  
6 804 74. Mullany LC, Lee TJ, Yone L, et al. Impact of community-based maternal health workers on coverage of  
7 805 essential maternal health interventions among internally displaced communities in Eastern  
8 806 Burma: the MOM project. *PLoS medicine* 2010;7(8):e1000317.  
9 807 75. Teela KC, Mullany LC, Lee CI, et al. Community-based delivery of maternal care in conflict-affected  
10 808 areas of eastern Burma: Perspectives from lay maternal health workers. *Social science &*  
11 809 *medicine* 2009;68(7):1332-40. doi: 10.1016/j.socscimed.2009.01.033  
12 810 76. Moucheraud C, Owen H, Singh NS, et al. Countdown to 2015 country case studies: what have we  
13 811 learned about processes and progress towards MDGs 4 and 5? *BMC public health*  
14 812 2016;16(S2):794. doi: 10.1186/s12889-016-3401-6  
15 813 77. Fernando D, de Silva NL, Ackers I, et al. Patient satisfaction and uptake of private-sector run malaria  
16 814 diagnosis clinics in a post-conflict district in Sri Lanka. *BMC Public Health* 2014;14:641. doi:  
17 815 10.1186/1471-2458-14-641  
18 816 78. Chi PC, Bulage P, Urdal H, et al. Barriers in the Delivery of Emergency Obstetric and Neonatal Care in  
19 817 Post-Conflict Africa: Qualitative Case Studies of Burundi and Northern Uganda: e0139120. *PLoS*  
20 818 *one* 2015;10(9) doi: 10.1371/journal.pone.0139120  
21 819 79. Iyengar P, Kerber K, Howe CJ, et al. Services for mothers and newborns during the ebola outbreak in  
22 820 liberia: the need for improvement in emergencies. *PLoS Curr* 2015;7 doi:  
23 821 10.1371/currents.outbreaks.4ba318308719ac86fbef91f8e56cb66f  
24 822 80. Balalian AA, Simonyan H, Hekimian K, et al. Adapting continuing medical education for post-conflict  
25 823 areas: assessment in Nagorno Karabagh - a qualitative study. *Human resources for health*  
26 824 2014;12:39. doi: 10.1186/1478-4491-12-39  
27 825 81. Chandrasekhar S, Gebreselassie T, Jayaraman A. Maternal Health Care Seeking Behavior in a Post-  
28 826 Conflict HIPC: The Case of Rwanda. *Popul Res Policy Rev* 2011;30(1):25-41. doi: 10.1007/s11113-  
29 827 010-9175-0  
30 828 82. Mwaka AD, Wabinga HR, Mayanja-Kizza H. Mind the gaps: a qualitative study of perceptions of  
31 829 healthcare professionals on challenges and proposed remedies for cervical cancer help-seeking  
32 830 in post conflict northern Uganda. *BMC Fam Pract* 2013;14:193. doi: 10.1186/1471-2296-14-193  
33 831 83. Roome E, Raven J, Martineau T. Human resource management in post-conflict health systems: review  
34 832 of research and knowledge gaps. *Confl Health* 2014;8:18. doi: 10.1186/1752-1505-8-18  
35 833 84. Bank W. World Bank Group Assistance to Low-Income Fragile and Conflict-Affected States: An  
36 834 Independent Evaluation: The World Bank 2015.  
37 835 85. Addison T, McGillivray M. Aid to conflict-affected countries: lessons for donors. *Conflict, Security &*  
38 836 *Development* 2004;4(3):347-67.  
39 837 86. Hill PS, Pavignani E, Michael M, et al. The "empty void" is a crowded space: health service provision  
40 838 at the margins of fragile and conflict affected states. *Confl Health* 2014;8:20. doi: 10.1186/1752-  
41 839 1505-8-20  
42 840 87. Witter S. Health financing in fragile and post-conflict states: What do we know and what are the  
43 841 gaps? *Social science & medicine* 2012;75(12):2370-77.  
44 842 88. Fujita N, Zwi AB, Nagai M, et al. A comprehensive framework for human resources for health system  
45 843 development in fragile and post-conflict states. *PLoS medicine* 2011;8(12):e1001146.  
46 844 89. Alonso A, Brughra R. Rehabilitating the health system after conflict in East Timor: a shift from NGO to  
47 845 government leadership. *Health policy and planning* 2006;21(3):206-16.  
48  
49  
50  
51  
52  
53  
54 846  
55  
56  
57  
58  
59  
60

1  
2  
3  
4  
5  
6  
7  
8  
9  
10  
11  
12  
13  
14  
15  
16  
17  
18  
19  
20  
21  
22  
23  
24  
25  
26  
27  
28  
29  
30  
31  
32  
33  
34  
35  
36  
37  
38  
39  
40  
41  
42  
43  
44  
45  
46  
47  
48  
49  
50  
51  
52  
53  
54  
55  
56  
57  
58  
59  
60

847 **Supporting Information**

848 S1 Table. Liberia policy, strategy, and other national documents reviewed

For peer review only

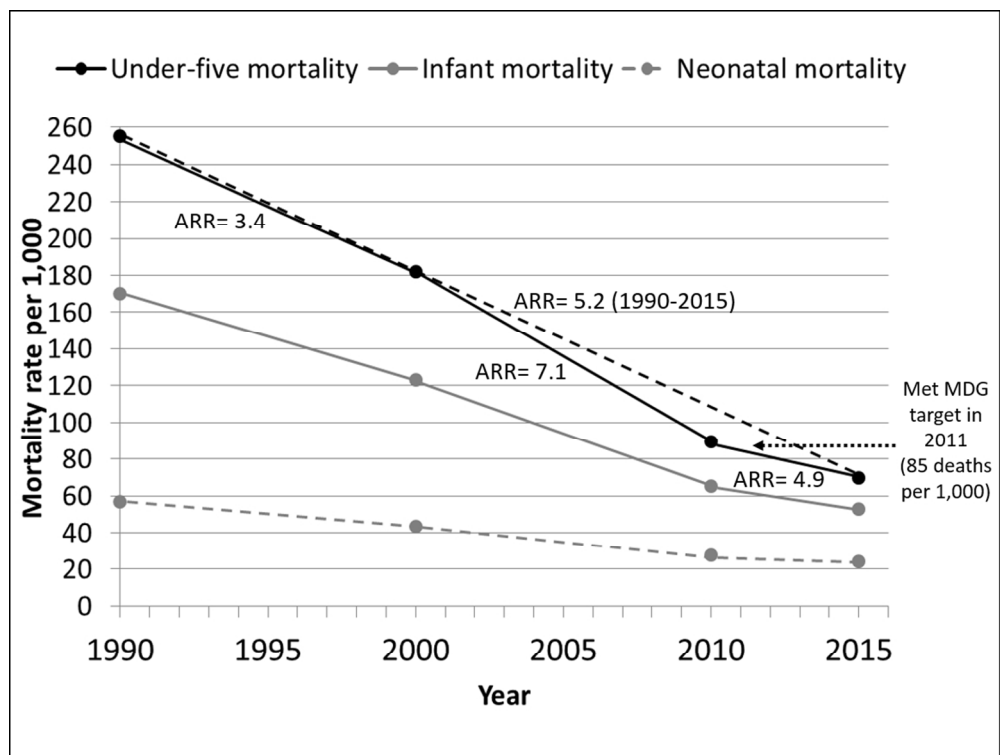

Figure 1: Under-five, infant, and neonatal mortality rates for Liberia in 1990, 2000, 2010, and 2015 (solid circles) with annual rates of reduction (ARR) for each period (solid and dashed lines).

98x74mm (300 x 300 DPI)

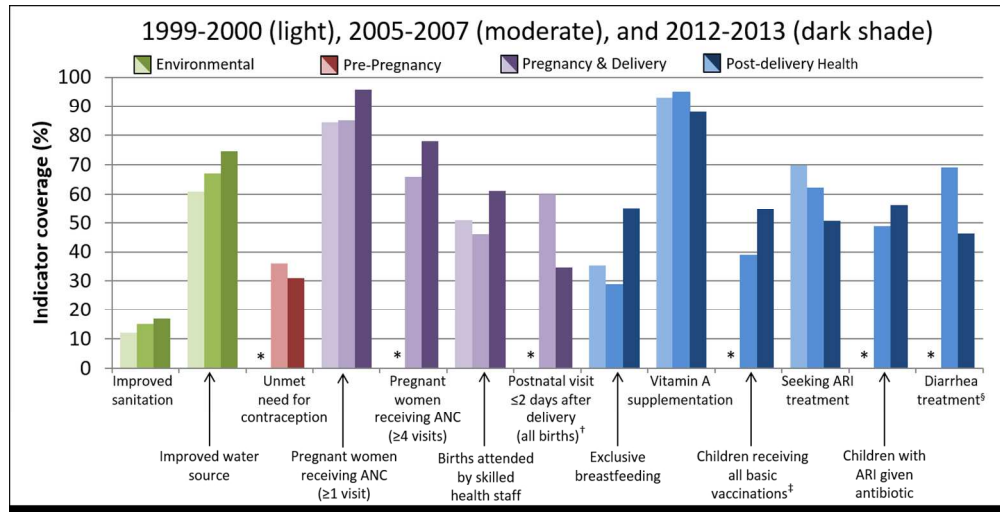

Figure 2: Changes in child survival indicator coverage in Liberia, 2000, 2007, and 2013\*.

127x64mm (300 x 300 DPI)

## Supplemental Table

Table S1. Liberia documents reviewed

| Document title (dates if not otherwise specified in title)                                                    |
|---------------------------------------------------------------------------------------------------------------|
| <b>Primary source documents* (Newest to oldest)</b>                                                           |
| Republic of Liberia Agenda for Transformation: Steps towards Liberia Rising 2030 (2012)                       |
| Accelerated Action Plan to Reduce Maternal and Neonatal Mortality, 2012-2016                                  |
| Situational Analysis of Newborn Health in Liberia (Parts A and B) (Drafts) (2012)                             |
| National Health and Social Welfare Policy and Plan, 2011-2021                                                 |
| Country Situational Analysis Report, 2011                                                                     |
| Road Map for Accelerating the Reduction of Maternal and Newborn Morbidity and Mortality in Liberia, 2011-2015 |
| Revised National Community Health Services Policy (2011)                                                      |
| Essential Package of Health Services: Primary Care, 2011-2021                                                 |
| Essential Package of Health Services: Secondary and Tertiary Care, 2011-2021                                  |
| National Strategy for Child Survival in Liberia, 2008-2011                                                    |
| <b>Other documents reviewed† (Newest to oldest)</b>                                                           |
| Micronutrient Powder Supplementation of Young Children Linked with IYCF community promotion, 2012-2015        |
| National Policy on Immunization, 2012                                                                         |
| National EPI Strategic Plan, 2011-2015                                                                        |
| National Sexual and Reproductive Health Policy (2010)                                                         |
| Integrated Guidelines of Prevention, Testing, Care and Treatment of HIV and AIDS in Liberia, 2010             |
| Report on the Assessment of Infant and Young Child Feeding Practices, Policies and Programmes in Liberia 2009 |

\*Primary documents extensively reviewed to obtain information on each content area identified in the abstraction guide

†Documents reviewed, but information on progress towards MDG#4 was sufficiently covered by the primary documents

Table S2. Characteristics of key informants in Liberia.

|                                                    | Ministry of Health<br>(N=11) |          | Donor organization<br>(N=8) |          | Community Based Organization<br>(N=14) |          | Health Care Worker<br>(N=14) |          |
|----------------------------------------------------|------------------------------|----------|-----------------------------|----------|----------------------------------------|----------|------------------------------|----------|
| <b>Sex, N (%)</b>                                  |                              |          |                             |          |                                        |          |                              |          |
| Male                                               | 8                            | (73)     | 5                           | (62.5)   | 10                                     | (71)     | 5                            | (36)     |
| Female                                             | 3                            | (27)     | 3                           | (37.5)   | 4                                      | (29)     | 9                            | (64)     |
| <b>Age, M (IQR)</b>                                | 45                           | (38, 55) | 40                          | (36, 49) | 40                                     | (36, 50) | 45                           | (40, 54) |
| <b>Ethnicity, N (%)</b>                            |                              |          |                             |          |                                        |          |                              |          |
| Bassa                                              | 1                            | (9)      | 1                           | (12.5)   | 0                                      | (0)      | 0                            | (0)      |
| Grebo                                              | 2                            | (18)     | 1                           | (12.5)   | 1                                      | (7)      | 2                            | (14)     |
| Kissi                                              | 1                            | (9)      | 0                           | (0)      | 1                                      | (7)      | 0                            | (0)      |
| Kpelle                                             | 2                            | (18)     | 1                           | (12.5)   | 4                                      | (29)     | 6                            | (43)     |
| Lorma                                              | 2                            | (18)     | 0                           | (0)      | 0                                      | (0)      | 1                            | (7)      |
| Mano                                               | 2                            | (18)     | 1                           | (12.5)   | 4                                      | (29)     | 1                            | (7)      |
| Other*                                             | 1                            | (9)      | 4                           | (50)     | 4                                      | (29)     | 4                            | (28)     |
| <b>Education, N (%)</b>                            |                              |          |                             |          |                                        |          |                              |          |
| Secondary                                          | 1                            | (9)      | 0                           | (0)      | 0                                      | (0)      | 0                            | (0)      |
| Post-secondary                                     | 10                           | (91)     | 8                           | (100)    | 14                                     | (100)    | 14                           | (100)    |
| <b>Median (IQR) years working for organization</b> | 7                            | (6, 9)   | 1                           | (1, 6)   | 5                                      | (3, 13)  | 7                            | (2, 15)  |

\* Other includes one each of Belleh, Dahn, Gbandi, Gola, and Kru; five foreign nationals (Ghana, Kenya, Nigeria,

Sierra Leone, and Uganda); and 3 not reported

Table S3. Characteristics of female focus group participants in Liberia.

|                                                       | <b>Rural participants<br/>(N=16)</b> | <b>Urban participants<br/>(N=21)</b> |
|-------------------------------------------------------|--------------------------------------|--------------------------------------|
| <b>Age, M (IQR)</b>                                   | 26 (22, 32.5)                        | 28 (21, 38)                          |
| <b>Ethnicity, N (%)</b>                               |                                      |                                      |
| Kpelle                                                | 12 (75)                              | 1 (5)                                |
| Lorma                                                 | 2 (13)                               | 2 (10)                               |
| Bassa                                                 | 0 (0)                                | 9 (43)                               |
| Kru                                                   | 0 (0)                                | 7 (33)                               |
| Vai                                                   | 0 (0)                                | 2 (10)                               |
| Other*                                                | 2 (13)                               | 0 (0)                                |
| <b>Education, N (%)</b>                               |                                      |                                      |
| None                                                  | 2 (14)                               | 2 (10)                               |
| Primary                                               | 7 (50)                               | 5 (24)                               |
| Secondary                                             | 3 (21)                               | 13 (62)                              |
| Post-secondary                                        | 2 (14)                               | 1 (5)                                |
| <b>Travel time to health care (dry season), N (%)</b> |                                      |                                      |
| Less than one hour                                    | 15 (94)                              | 19 (90)                              |
| One to two hours                                      | 0 (0)                                | 2 (10)                               |
| More than two hours                                   | 1 (6)                                | 0 (0)                                |
| <b>Number of living children, M (IQR)</b>             | 1 (1, 3)                             | 2 (1, 4)                             |
| <b>Age of youngest child, M (IQR)</b>                 | 2 yr (11 mo, 4 yr)                   | 2 yr (1 yr, 3 yr)                    |
| <b>Any children who died &lt;5yrs old, N (%)</b>      |                                      |                                      |
| No                                                    | 12 (80)                              | 12 (57)                              |
| Yes                                                   | 3 (20)                               | 9 (43)                               |
| <b>Place of delivery for latest pregnancy, N (%)</b>  |                                      |                                      |

|                                                    |    |       |    |      |
|----------------------------------------------------|----|-------|----|------|
| Health facility                                    | 16 | (100) | 17 | (81) |
| Home                                               | 0  | (0)   | 4  | (19) |
| <b>Birth attendant for latest pregnancy, N (%)</b> |    |       |    |      |
| Doctor                                             | 2  | (13)  | 3  | (14) |
| Nurse/midwife                                      | 14 | (88)  | 17 | (81) |
| Traditional birth attendant                        | 0  | (0)   | 1  | (5)  |

\* Other includes one each Kisii and Mandingo



# Standards for Reporting Qualitative Research (SRQR)\*

<http://www.equator-network.org/reporting-guidelines/srqr/>

Page/line no(s).

## Title and abstract

|                                                                                                                                                                                                                                                              |                               |
|--------------------------------------------------------------------------------------------------------------------------------------------------------------------------------------------------------------------------------------------------------------|-------------------------------|
| <p><b>Title</b> - Concise description of the nature and topic of the study Identifying the study as qualitative or indicating the approach (e.g., ethnography, grounded theory) or data collection methods (e.g., interview, focus group) is recommended</p> | <p>Page 1, lines 1-2</p>      |
| <p><b>Abstract</b> - Summary of key elements of the study using the abstract format of the intended publication; typically includes background, purpose, methods, results, and conclusions</p>                                                               | <p>Pages 2-3, lines 28-52</p> |

## Introduction

|                                                                                                                                                                     |                                |
|---------------------------------------------------------------------------------------------------------------------------------------------------------------------|--------------------------------|
| <p><b>Problem formulation</b> - Description and significance of the problem/phenomenon studied; review of relevant theory and empirical work; problem statement</p> | <p>Pages 4-6, lines 72-119</p> |
| <p><b>Purpose or research question</b> - Purpose of the study and specific objectives or questions</p>                                                              | <p>Page 6, lines 120-128</p>   |

## Methods

|                                                                                                                                                                                                                                                                                                                                                                                                             |                                   |
|-------------------------------------------------------------------------------------------------------------------------------------------------------------------------------------------------------------------------------------------------------------------------------------------------------------------------------------------------------------------------------------------------------------|-----------------------------------|
| <p><b>Qualitative approach and research paradigm</b> - Qualitative approach (e.g., ethnography, grounded theory, case study, phenomenology, narrative research) and guiding theory if appropriate; identifying the research paradigm (e.g., postpositivist, constructivist/ interpretivist) is also recommended; rationale**</p>                                                                            | <p>Page 16, lines 279-283</p>     |
| <p><b>Researcher characteristics and reflexivity</b> - Researchers' characteristics that may influence the research, including personal attributes, qualifications/experience, relationship with participants, assumptions, and/or presuppositions; potential or actual interaction between researchers' characteristics and the research questions, approach, methods, results, and/or transferability</p> | <p>Page 16, lines 267-275</p>     |
| <p><b>Context</b> - Setting/site and salient contextual factors; rationale**</p>                                                                                                                                                                                                                                                                                                                            | <p>Page 10-11, lines 174- 191</p> |
| <p><b>Sampling strategy</b> - How and why research participants, documents, or events were selected; criteria for deciding when no further sampling was necessary (e.g., sampling saturation); rationale**</p>                                                                                                                                                                                              | <p>Pages 7-13</p>                 |
| <p><b>Ethical issues pertaining to human subjects</b> - Documentation of approval by an appropriate ethics review board and participant consent, or explanation for lack thereof; other confidentiality and data security issues</p>                                                                                                                                                                        | <p>Page 16, lines 285-286</p>     |
| <p><b>Data collection methods</b> - Types of data collected; details of data collection procedures including (as appropriate) start and stop dates of data collection and analysis, iterative process, triangulation of sources/methods, and modification of procedures in response to evolving study findings; rationale**</p>                                                                             | <p>Pages 7-10 and Pages 15-16</p> |

|    |                                                                                                                                                                    |                               |
|----|--------------------------------------------------------------------------------------------------------------------------------------------------------------------|-------------------------------|
| 1  |                                                                                                                                                                    |                               |
| 2  |                                                                                                                                                                    |                               |
| 3  | <b>Data collection instruments and technologies</b> - Description of instruments (e.g.,                                                                            | Pages 7-10 and<br>Pages 15-16 |
| 4  | interview guides, questionnaires) and devices (e.g., audio recorders) used for data<br>collection; if/how the instrument(s) changed over the course of the study   |                               |
| 5  |                                                                                                                                                                    |                               |
| 6  |                                                                                                                                                                    |                               |
| 7  | <b>Units of study</b> - Number and relevant characteristics of participants, documents,                                                                            | Pages 7-8 and<br>Pages 11-12  |
| 8  | or events included in the study; level of participation (could be reported in results)                                                                             |                               |
| 9  |                                                                                                                                                                    |                               |
| 10 | <b>Data processing</b> - Methods for processing data prior to and during analysis,                                                                                 | Pages 15-16                   |
| 11 | including transcription, data entry, data management and security, verification of<br>data integrity, data coding, and anonymization/de-identification of excerpts |                               |
| 12 |                                                                                                                                                                    |                               |
| 13 | <b>Data analysis</b> - Process by which inferences, themes, etc., were identified and                                                                              | Page 16                       |
| 14 | developed, including the researchers involved in data analysis; usually references a<br>specific paradigm or approach; rationale**                                 |                               |
| 15 |                                                                                                                                                                    |                               |
| 16 |                                                                                                                                                                    |                               |
| 17 | <b>Techniques to enhance trustworthiness</b> - Techniques to enhance trustworthiness                                                                               | Page 16                       |
| 18 | and credibility of data analysis (e.g., member checking, audit trail, triangulation);<br>rationale**                                                               |                               |
| 19 |                                                                                                                                                                    |                               |
| 20 |                                                                                                                                                                    |                               |

### Results/findings

|    |                                                                                                          |                       |
|----|----------------------------------------------------------------------------------------------------------|-----------------------|
| 21 |                                                                                                          |                       |
| 22 |                                                                                                          |                       |
| 23 | <b>Synthesis and interpretation</b> - Main findings (e.g., interpretations, inferences, and              | Throughout<br>results |
| 24 | themes); might include development of a theory or model, or integration with<br>prior research or theory |                       |
| 25 |                                                                                                          |                       |
| 26 | <b>Links to empirical data</b> - Evidence (e.g., quotes, field notes, text excerpts,                     | Throughout<br>results |
| 27 | photographs) to substantiate analytic findings                                                           |                       |
| 28 |                                                                                                          |                       |
| 29 |                                                                                                          |                       |

### Discussion

|    |                                                                                                                                                                                                                                                                                                                                   |                               |
|----|-----------------------------------------------------------------------------------------------------------------------------------------------------------------------------------------------------------------------------------------------------------------------------------------------------------------------------------|-------------------------------|
| 30 |                                                                                                                                                                                                                                                                                                                                   |                               |
| 31 |                                                                                                                                                                                                                                                                                                                                   |                               |
| 32 | <b>Integration with prior work, implications, transferability, and contribution(s) to</b>                                                                                                                                                                                                                                         | Throughout<br>discussion      |
| 33 | <b>the field</b> - Short summary of main findings; explanation of how findings and<br>conclusions connect to, support, elaborate on, or challenge conclusions of earlier<br>scholarship; discussion of scope of application/generalizability; identification of<br>unique contribution(s) to scholarship in a discipline or field |                               |
| 34 |                                                                                                                                                                                                                                                                                                                                   |                               |
| 35 |                                                                                                                                                                                                                                                                                                                                   |                               |
| 36 |                                                                                                                                                                                                                                                                                                                                   |                               |
| 37 |                                                                                                                                                                                                                                                                                                                                   |                               |
| 38 | <b>Limitations</b> - Trustworthiness and limitations of findings                                                                                                                                                                                                                                                                  | Pages 28-29,<br>lines 552-567 |
| 39 |                                                                                                                                                                                                                                                                                                                                   |                               |
| 40 |                                                                                                                                                                                                                                                                                                                                   |                               |

### Other

|    |                                                                                            |                               |
|----|--------------------------------------------------------------------------------------------|-------------------------------|
| 41 |                                                                                            |                               |
| 42 |                                                                                            |                               |
| 43 | <b>Conflicts of interest</b> - Potential sources of influence or perceived influence on    | Page 29, lines<br>586-587     |
| 44 | study conduct and conclusions; how these were managed                                      |                               |
| 45 |                                                                                            |                               |
| 46 | <b>Funding</b> - Sources of funding and other support; role of funders in data collection, | Pages 29-30,<br>lines 586-593 |
| 47 | interpretation, and reporting                                                              |                               |
| 48 |                                                                                            |                               |

\*The authors created the SRQR by searching the literature to identify guidelines, reporting standards, and critical appraisal criteria for qualitative research; reviewing the reference lists of retrieved sources; and contacting experts to gain feedback. The SRQR aims to improve the transparency of all aspects of qualitative research by providing clear standards for reporting qualitative research.

1  
2  
3  
4  
5  
6  
7  
8  
9  
10  
11  
12  
13  
14  
15  
16  
17  
18  
19  
20  
21  
22  
23  
24  
25  
26  
27  
28  
29  
30  
31  
32  
33  
34  
35  
36  
37  
38  
39  
40  
41  
42  
43  
44  
45  
46  
47  
48  
49  
50  
51  
52  
53  
54  
55  
56  
57  
58  
59  
60

\*\*The rationale should briefly discuss the justification for choosing that theory, approach, method, or technique rather than other options available, the assumptions and limitations implicit in those choices, and how those choices influence study conclusions and transferability. As appropriate, the rationale for several items might be discussed together.

**Reference:**

O'Brien BC, Harris IB, Beckman TJ, Reed DA, Cook DA. **Standards for reporting qualitative research: a synthesis of recommendations.** *Academic Medicine*, Vol. 89, No. 9 / Sept 2014  
DOI: 10.1097/ACM.0000000000000388

For peer review only
