# Supplementary material for: Factors influencing rapid progress in child health in post-conflict Liberia: a mixed methods country case study on progress in child survival, 2000–2013
Source: PubMed Central journal article supplement — BMJ Open. 2018 Oct 15;8(10):e021879. doi: 10.1136/bmjopen-2018-021879 (PMC6196853; doi:10.1136/bmjopen-2018-021879), 2018-10-15
Supplement: bmjopen-2018-021879supp001.pdf [file bmjopen-2018-021879supp001.pdf]

## Supplemental Table

**Table S1. Liberia documents reviewed**

| Document title (dates if not otherwise specified in title)                                                    |
|---------------------------------------------------------------------------------------------------------------|
| <b><i>Primary source documents* (Newest to oldest)</i></b>                                                    |
| Republic of Liberia Agenda for Transformation: Steps towards Liberia Rising 2030 (2012)                       |
| Accelerated Action Plan to Reduce Maternal and Neonatal Mortality, 2012-2016                                  |
| Situational Analysis of Newborn Health in Liberia (Parts A and B) (Drafts) (2012)                             |
| National Health and Social Welfare Policy and Plan, 2011-2021                                                 |
| Country Situational Analysis Report, 2011                                                                     |
| Road Map for Accelerating the Reduction of Maternal and Newborn Morbidity and Mortality in Liberia, 2011-2015 |
| Revised National Community Health Services Policy (2011)                                                      |
| Essential Package of Health Services: Primary Care, 2011-2021                                                 |
| Essential Package of Health Services: Secondary and Tertiary Care, 2011-2021                                  |
| National Strategy for Child Survival in Liberia, 2008-2011                                                    |
| <b><i>Other documents reviewed† (Newest to oldest)</i></b>                                                    |
| Micronutrient Powder Supplementation of Young Children Linked with IYCF community promotion, 2012-2015        |
| National Policy on Immunization, 2012                                                                         |
| National EPI Strategic Plan, 2011-2015                                                                        |
| National Sexual and Reproductive Health Policy (2010)                                                         |
| Integrated Guidelines of Prevention, Testing, Care and Treatment of HIV and AIDS in Liberia, 2010             |
| Report on the Assessment of Infant and Young Child Feeding Practices, Policies and Programmes in Liberia 2009 |

\*Primary documents extensively reviewed to obtain information on each content area identified in the abstraction guide

†Documents reviewed, but information on progress towards MDG#4 was sufficiently covered by the primary documents

Table S2. Characteristics of key informants in Liberia.

|                                                    | <b>Ministry of Health<br/>(N=11)</b> |          | <b>Donor organization<br/>(N=8)</b> |          | <b>Community Based Organization<br/>(N=14)</b> |          | <b>Health Care Worker<br/>(N=14)</b> |          |
|----------------------------------------------------|--------------------------------------|----------|-------------------------------------|----------|------------------------------------------------|----------|--------------------------------------|----------|
| <b>Sex, N (%)</b>                                  |                                      |          |                                     |          |                                                |          |                                      |          |
| Male                                               | 8                                    | (73)     | 5                                   | (62.5)   | 10                                             | (71)     | 5                                    | (36)     |
| Female                                             | 3                                    | (27)     | 3                                   | (37.5)   | 4                                              | (29)     | 9                                    | (64)     |
| <b>Age, M (IQR)</b>                                | 45                                   | (38, 55) | 40                                  | (36, 49) | 40                                             | (36, 50) | 45                                   | (40, 54) |
| <b>Ethnicity, N (%)</b>                            |                                      |          |                                     |          |                                                |          |                                      |          |
| Bassa                                              | 1                                    | (9)      | 1                                   | (12.5)   | 0                                              | (0)      | 0                                    | (0)      |
| Grebo                                              | 2                                    | (18)     | 1                                   | (12.5)   | 1                                              | (7)      | 2                                    | (14)     |
| Kissi                                              | 1                                    | (9)      | 0                                   | (0)      | 1                                              | (7)      | 0                                    | (0)      |
| Kpelle                                             | 2                                    | (18)     | 1                                   | (12.5)   | 4                                              | (29)     | 6                                    | (43)     |
| Lorma                                              | 2                                    | (18)     | 0                                   | (0)      | 0                                              | (0)      | 1                                    | (7)      |
| Mano                                               | 2                                    | (18)     | 1                                   | (12.5)   | 4                                              | (29)     | 1                                    | (7)      |
| Other*                                             | 1                                    | (9)      | 4                                   | (50)     | 4                                              | (29)     | 4                                    | (28)     |
| <b>Education, N (%)</b>                            |                                      |          |                                     |          |                                                |          |                                      |          |
| Secondary                                          | 1                                    | (9)      | 0                                   | (0)      | 0                                              | (0)      | 0                                    | (0)      |
| Post-secondary                                     | 10                                   | (91)     | 8                                   | (100)    | 14                                             | (100)    | 14                                   | (100)    |
| <b>Median (IQR) years working for organization</b> | 7                                    | (6, 9)   | 1                                   | (1, 6)   | 5                                              | (3, 13)  | 7                                    | (2, 15)  |

\* Other includes one each of Belleh, Dahn, Gbandi, Gola, and Kru; five foreign nationals (Ghana, Kenya, Nigeria,

Sierra Leone, and Uganda); and 3 not reported

Table S3. Characteristics of female focus group participants in Liberia.

|                                                       | <b>Rural participants<br/>(N=16)</b> | <b>Urban participants<br/>(N=21)</b> |
|-------------------------------------------------------|--------------------------------------|--------------------------------------|
| <b>Age, M (IQR)</b>                                   | 26 (22, 32.5)                        | 28 (21, 38)                          |
| <b>Ethnicity, N (%)</b>                               |                                      |                                      |
| Kpelle                                                | 12 (75)                              | 1 (5)                                |
| Lorma                                                 | 2 (13)                               | 2 (10)                               |
| Bassa                                                 | 0 (0)                                | 9 (43)                               |
| Kru                                                   | 0 (0)                                | 7 (33)                               |
| Vai                                                   | 0 (0)                                | 2 (10)                               |
| Other*                                                | 2 (13)                               | 0 (0)                                |
| <b>Education, N (%)</b>                               |                                      |                                      |
| None                                                  | 2 (14)                               | 2 (10)                               |
| Primary                                               | 7 (50)                               | 5 (24)                               |
| Secondary                                             | 3 (21)                               | 13 (62)                              |
| Post-secondary                                        | 2 (14)                               | 1 (5)                                |
| <b>Travel time to health care (dry season), N (%)</b> |                                      |                                      |
| Less than one hour                                    | 15 (94)                              | 19 (90)                              |
| One to two hours                                      | 0 (0)                                | 2 (10)                               |
| More than two hours                                   | 1 (6)                                | 0 (0)                                |
| <b>Number of living children, M (IQR)</b>             | 1 (1, 3)                             | 2 (1, 4)                             |
| <b>Age of youngest child, M (IQR)</b>                 | 2 yr (11 mo, 4 yr)                   | 2 yr (1 yr, 3 yr)                    |
| <b>Any children who died &lt;5yrs old, N (%)</b>      |                                      |                                      |
| No                                                    | 12 (80)                              | 12 (57)                              |
| Yes                                                   | 3 (20)                               | 9 (43)                               |
| <b>Place of delivery for latest pregnancy, N (%)</b>  |                                      |                                      |

|                                                    |    |       |    |      |
|----------------------------------------------------|----|-------|----|------|
| Health facility                                    | 16 | (100) | 17 | (81) |
| Home                                               | 0  | (0)   | 4  | (19) |
| <b>Birth attendant for latest pregnancy, N (%)</b> |    |       |    |      |
| Doctor                                             | 2  | (13)  | 3  | (14) |
| Nurse/midwife                                      | 14 | (88)  | 17 | (81) |
| Traditional birth attendant                        | 0  | (0)   | 1  | (5)  |

\* Other includes one each Kisii and Mandingo
